# Supplementary material
Source: PubMed Central journal article supplement (PMC8484622)
Supplement: 41431_2021_897_MOESM4_ESM.pdf [file 41431_2021_897_MOESM4_ESM.pdf]

Table S3. Time estimates used for calibration of the phylogeny.

| <b>Haplogroup</b> | <b>Calibration point</b> | <b>Age</b> | <b>95% confidence intervals</b> | <b>Reference</b>    |
|-------------------|--------------------------|------------|---------------------------------|---------------------|
| E2                | E2-M215                  | 26 492     | 24775-28352                     | Karmin et al., 2015 |
| G                 | G2a-P15                  | 19 405     | 17781-21079                     | Karmin et al., 2015 |
| J1                | J2-M172                  | 30 261     | 28570-32006                     | Karmin et al., 2015 |
| Q                 | Q1'2-L472                | 28 894     | 27324-30430                     | Karmin et al., 2015 |
