# Supplementary material
Source: PubMed Central journal article supplement (PMC8484622)
Supplement: 41431_2021_897_MOESM5_ESM.pdf [file 41431_2021_897_MOESM5_ESM.pdf]

**Table S4. Branch defining variants on the E2 phylogeny**

| <b>SNP position<br/>(GRCh37)</b> | <b>Haplogroup</b> | <b>Defining<br/>marker</b> | <b>ISOGG<br/>marker</b> | <b>Yfull<br/>marker</b> | <b>Ref</b> | <b>Allele<br/>Seq</b> | <b>Node</b> |
|----------------------------------|-------------------|----------------------------|-------------------------|-------------------------|------------|-----------------------|-------------|
| 2700266                          | E2a               | M78_eq                     | CTS58                   |                         | A          | T                     | node3       |
| 6914284                          | E2a               | M78_eq                     | CTS627                  |                         | A          | G                     | node3       |
| 6943527                          | E2a               | M78_eq                     | CTS675                  |                         | A          | G                     | node3       |
| 7804308                          | E2a               | M78_eq                     | PF2108                  |                         | C          | T                     | node3       |
| 7819560                          | E2a               | M78_eq                     | PF2109                  |                         | G          | A                     | node3       |
| 7921060                          | E2a               | M78_eq                     | PF2110                  |                         | G          | A                     | node3       |
| 7921827                          | E2a               | M78_eq                     | PF2111                  |                         | T          | C                     | node3       |
| 7923011                          | E2a               | M78_eq                     | PF2112                  |                         | C          | T                     | node3       |
| 8232450                          | E2a               | M78_eq                     | PF2114                  |                         | C          | A                     | node3       |
| 8361073                          | E2a               | M78_eq                     | PF2115                  |                         | G          | T                     | node3       |
| 8483852                          | E2a               | M78_eq                     | F1244                   |                         | C          | T                     | node3       |
| 8586933                          | E2a               | M78_eq                     | PF2117                  |                         | T          | C                     | node3       |
| 8775837                          | E2a               | M78_eq                     | PF2118                  |                         | T          | A                     | node3       |
| 9898716                          | E2a               | M78_eq                     | PF2119                  |                         | G          | A                     | node3       |
| 14062488                         | E2a               | M78_eq                     |                         |                         | A          | T                     | node3       |
| 14242950                         | E2a               | M78_eq                     | CTS2270                 |                         | G          | A                     | node3       |
| 14359692                         | E2a               | M78_eq                     | CTS2551                 |                         | G          | T                     | node3       |
| 14410669                         | E2a               | M78_eq                     | CTS2661                 |                         | C          | T                     | node3       |
| 14696327                         | E2a               | M78_eq                     | CTS3171                 |                         | C          | A                     | node3       |
| 14790675                         | E2a               | M78_eq                     | CTS3278                 |                         | A          | C                     | node3       |
| 15095592                         | E2a               | M78_eq                     | CTS3657                 |                         | C          | T                     | node3       |
| 15479586                         | E2a               | M78_eq                     | CTS4208                 |                         | T          | C                     | node3       |
| 15520497                         | E2a               | M78_eq                     | CTS4256                 |                         | T          | C                     | node3       |
| 15574144                         | E2a               | M78_eq                     | L544                    |                         | T          | C                     | node3       |
| 16362850                         | E2a               | M78_eq                     | CTS5561                 |                         | A          | T                     | node3       |
| 16438097                         | E2a               | M78_eq                     | CTS5697                 |                         | C          | T                     | node3       |
| 16925303                         | E2a               | M78_eq                     | CTS6475                 |                         | G          | A                     | node3       |
| 17090474                         | E2a               | M78_eq                     |                         |                         | G          | A                     | node3       |
| 17102625                         | E2a               | M78_eq                     | CTS6780                 |                         | T          | C                     | node3       |
| 17127989                         | E2a               | M78_eq                     | CTS6828                 |                         | G          | A                     | node3       |
| 17331551                         | E2a               | M78_eq                     | CTS7166                 |                         | C          | T                     | node3       |
| 17400322                         | E2a               | M78_eq                     | CTS7281                 |                         | C          | T                     | node3       |
| 17516070                         | E2a               | M78_eq                     | L546                    |                         | C          | T                     | node3       |
| 17707097                         | E2a               | M78_eq                     | CTS7853                 |                         | T          | C                     | node3       |
| 17744738                         | E2a               | M78_eq                     | CTS7924                 |                         | A          | G                     | node3       |
| 17792632                         | E2a               | M78_eq                     | CTS8002                 |                         | C          | A                     | node3       |
| 18149476                         | E2a               | M78_eq                     | CTS8685                 |                         | T          | G                     | node3       |
| 18538216                         | E2a               | M78_eq                     | CTS8899                 |                         | C          | A                     | node3       |
| 18710064                         | E2a               | M78_eq                     | CTS9140                 |                         | C          | T                     | node3       |
| 18765146                         | E2a               | M78_eq                     | CTS9236                 |                         | T          | C                     | node3       |
| 18918010                         | E2a               | M78_eq                     | CTS9471                 |                         | A          | T                     | node3       |
| 18949452                         | E2a               | M78_eq                     | CTS9527                 |                         | C          | T                     | node3       |
| 19044813                         | E2a               | M78_eq                     |                         |                         | T          | A                     | node3       |
| 19372895                         | E2a               | M78_eq                     | L547                    |                         | C          | T                     | node3       |
| 19396726                         | E2a               | M78_eq                     | CTS10323                |                         | T          | C                     | node3       |
| 19420177                         | E2a/J2b4          | M78_eq                     | CTS10357                |                         | G          | A                     | node3       |

|          |          |          |           |       |   |       |       |
|----------|----------|----------|-----------|-------|---|-------|-------|
| 19564788 | E2a      | M78_eq   |           | C     | T | node3 |       |
| 19565462 | E2a      | M78_eq   | CTS10617  | C     | G | node3 |       |
| 21036413 | E2a      | M78_eq   | PF2173    | C     | T | node3 |       |
| 21117557 | E2a      | M78_eq   | PF1951    | C     | A | node3 |       |
| 21188925 | E2a      | M78_eq   | PF2174    | A     | C | node3 |       |
| 21369924 | E2a      | M78_eq   | PF2175    | G     | A | node3 |       |
| 21645802 | E2a      | M78_eq   | PF2180    | G     | C | node3 |       |
| 21775724 | E2a      | M78_eq   | Z1212     | T     | G | node3 |       |
| 21860060 | E2a      | M78_eq   | PF2185    | G     | C | node3 |       |
| 21893303 | E2a      | M78      | M78       | C     | T | node3 |       |
| 22080316 | E2a      | M78_eq   | PF2188    | G     | A | node3 |       |
| 22473778 | E2a      | M78_eq   |           | A     | G | node3 |       |
| 22557921 | E2a      | M78_eq   | PF2195    | C     | T | node3 |       |
| 22898839 | E2a      | M78_eq   | CTS11015  | T     | C | node3 |       |
| 22940845 | E2a      | M78_eq   | CTS11082  | T     | A | node3 |       |
| 22999966 | E2a      | M78_eq   | CTS11191  | A     | G | node3 |       |
| 23161406 | E2a      | M78_eq   | CTS11560  | G     | A | node3 |       |
| 23499601 | E2a      | M78_eq   | PF2201    | T     | C | node3 |       |
| 23973415 | E2a      | M78_eq   | L539      | G     | A | node3 |       |
| 2849724  | E2a3     | Z1902_eq | CTS256    | T     | C | node4 |       |
| 22823155 | E2a3     | Z1902    | CTS10890  | A     | G | node4 |       |
| 6823099  | E2a3-V32 | V32_eq   | V12       | A     | G | node5 |       |
| 7560735  | E2a3-V32 | V32_eq   | FGC7696   | G     | A | node5 |       |
| 7674978  | E2a3-V32 | V32_eq   | Z1217     | C     | T | node5 |       |
| 8488796  | E2a3-V32 | V32_eq   | FGC7692   | Y2863 | G | A     | node5 |
| 8650741  | E2a3-V32 | V32_eq   | FGC2152   | Y6741 | G | A     | node5 |
| 9858686  | E2a3-V32 | V32_eq   | FGC2163   | Y2868 | C | G     | node5 |
| 14088696 | E2a3-V32 | V32_eq   |           | G     | A | node5 |       |
| 14202887 | E2a3-V32 | V32_eq   | CTS2163   | A     | G | node5 |       |
| 14595380 | E2a3-V32 | V32_eq   | CTS2967   | G     | A | node5 |       |
| 14645286 | E2a3-V32 | V32_eq   | CTS3073   | G     | C | node5 |       |
| 15040454 | E2a3-V32 | V32_eq   | CTS3578   | C     | A | node5 |       |
| 15459213 | E2a3-V32 | V32_eq   | CTS4185   | T     | C | node5 |       |
| 15664140 | E2a3-V32 | V32_eq   | CTS4473   | C     | T | node5 |       |
| 15738879 | E2a3-V32 | V32_eq   | CTS4622   | A     | G | node5 |       |
| 16089433 | E2a3-V32 | V32_eq   | CTS5254.1 | G     | C | node5 |       |
| 16260541 | E2a3-V32 | V32_eq   | CTS5412   | A     | T | node5 |       |
| 16411884 | E2a3-V32 | V32_eq   | CTS5646   | C     | T | node5 |       |
| 16731682 | E2a3-V32 | V32_eq   | CTS6211   | A     | G | node5 |       |
| 17138662 | E2a3-V32 | V32_eq   | CTS6839   | G     | A | node5 |       |
| 17240229 | E2a3-V32 | V32_eq   | CTS7017   | G     | T | node5 |       |
| 17312965 | E2a3-V32 | V32_eq   | CTS7136   | C     | T | node5 |       |
| 18613279 | E2a3-V32 | V32_eq   | CTS9007   | T     | G | node5 |       |
| 18776848 | E2a3-V32 | V32_eq   | CTS9249   | G     | A | node5 |       |
| 18953096 | E2a3-V32 | V32_eq   | FGC2168   | Y6743 | G | A     | node5 |
| 19467705 | E2a3-V32 | V32_eq   | CTS10461  | T     | C | node5 |       |
| 21706148 | E2a3-V32 | V32_eq   | FGC2158   | Y6745 | G | A     | node5 |
| 22035827 | E2a3-V32 | V32_eq   | FGC2155   | Y6746 | G | A     | node5 |
| 22459481 | E2a3-V32 | V32_eq   |           | A     | C | node5 |       |
| 23161549 | E2a3-V32 | V32_eq   | CTS11561  | G     | T | node5 |       |

|          |          |          |          |        |   |   |        |
|----------|----------|----------|----------|--------|---|---|--------|
| 23424135 | E2a3-V32 | V32_eq   | CTS12019 |        | T | C | node5  |
| 2806928  | E2a1'2   | Z1919_eq | CTS202   |        | C | G | node7  |
| 2807008  | E2a1'2   | Z1919_eq |          | Y2478  | A | G | node7  |
| 15499572 | E2a1'2   | Z1919    | CTS4231  |        | G | A | node7  |
| 15502485 | E2a1'2   | Z1919_eq | CTS4235  |        | T | A | node7  |
| 18547277 | E2a1'2   | Z1919_eq |          |        | C | G | node7  |
| 6810069  | E2a2     | V22_eq   | CTS508   |        | G | A | node8  |
| 6850437  | E2a2     | V22_eq   | AM00909  |        | G | A | node8  |
| 6859957  | E2a2     | V22      | V22      |        | T | C | node8  |
| 6930150  | E2a2     | V22_eq   | AM00910  | Y2521  | C | T | node8  |
| 7744127  | E2a2     | V22_eq   | FGC7786  | Y2523  | T | C | node8  |
| 9038846  | E2a2     | V22_eq   |          | Y2526  | G | A | node8  |
| 9394458  | E2a2     | V22_eq   | FGC7782  | Y2528  | G | A | node8  |
| 14216946 | E2a2     | V22_eq   | AM00882  |        | G | T | node8  |
| 14500476 | E2a2     | V22_eq   | AM00885  |        | G | A | node8  |
| 15708392 | E2a2     | V22_eq   | AM00887  |        | G | A | node8  |
| 16190569 | E2a2     | V22_eq   |          |        | C | T | node8  |
| 16890322 | E2a2     | V22_eq   | AM00894  |        | G | A | node8  |
| 18266842 | E2a2     | V22_eq   | AM00899  |        | C | T | node8  |
| 18725131 | E2a2     | V22_eq   | AM00900^ | Y2543  | G | T | node8  |
| 18957059 | E2a2     | V22_eq   | CTS9547  |        | C | G | node8  |
| 20814718 | E2a2     | V22_eq   | FGC2671  | Y2547  | A | C | node8  |
| 21620683 | E2a2     | V22_eq   | AM00902  | Y8900  | T | C | node8  |
| 21866497 | E2a2     | V22_eq   | AM00903  | Y8901  | G | A | node8  |
| 23123241 | E2a2     | V22_eq   |          | Y2554  | A | C | node8  |
| 23376716 | E2a2     | V22_eq   | AM00905  |        | C | T | node8  |
| 24481832 | E2a2     | V22_eq   | FGC2674  | Y2557  | G | C | node8  |
| 8117312  | E2a1     | L618_eq  | PF6786   |        | C | A | node16 |
| 8262442  | E2a1     | L618_eq  | PF2215   |        | A | G | node16 |
| 14060964 | E2a1     | L618_eq  | CTS1773  |        | G | A | node16 |
| 14151247 | E2a1     | L618_eq  | CTS2003  |        | C | G | node16 |
| 14370275 | E2a1     | L618_eq  | PF2221   |        | G | A | node16 |
| 14528643 | E2a1     | L618_eq  |          |        | G | A | node16 |
| 14801129 | E2a1     | L618_eq  | CTS3287  |        | A | G | node16 |
| 15134772 | E2a1     | L618_eq  | CTS3728  |        | A | C | node16 |
| 15229329 | E2a1     | L618_eq  | CTS3860  |        | G | A | node16 |
| 15339697 | E2a1     | L618     | L618     |        | T | C | node16 |
| 16189080 | E2a1     | L618_eq  | CTS5291  |        | T | G | node16 |
| 16345952 | E2a1     | L618_eq  | CTS5527  |        | A | G | node16 |
| 16712047 | E2a1     | L618_eq  | CTS6178  |        | C | G | node16 |
| 17171194 | E2a1     | L618_eq  | CTS6884  |        | C | T | node16 |
| 17356852 | E2a1     | L618_eq  | CTS7217  | Y71514 | G | C | node16 |
| 17396160 | E2a1     | L618_eq  | CTS7273  |        | C | T | node16 |
| 18666667 | E2a1     | L618_eq  | CTS9086  |        | G | A | node16 |
| 22073053 | E2a1     | L618_eq  | PF2246   |        | G | A | node16 |
| 22832818 | E2a1     | L618_eq  | CTS10912 |        | A | T | node16 |
| 23298785 | E2a1     | L618_eq  |          |        | T | C | node16 |
| 23381382 | E2a1     | L618_eq  | CTS11953 |        | T | C | node16 |
| 23992777 | E2a1     | L618_eq  | PF2252   |        | G | A | node16 |
| 6814246  | E2a1-V13 | V13_eq   | PF2210   |        | T | C | node17 |

|          |              |            |           |        |   |   |                 |
|----------|--------------|------------|-----------|--------|---|---|-----------------|
| 6842263  | E2a1-V13     | V13        | PF2211    |        | G | A | node17          |
| 7015122  | E2a1-V13     | V13_eq     | CTS791    |        | A | G | node17          |
| 7389526  | E2a1-V13     | V13_eq     | CTS1408   |        | C | A | node17          |
| 7675494  | E2a1-V13     | V13_eq     | PF2213    |        | G | A | node17          |
| 14231555 | E2a1-V13     | V13_eq     | L542      |        | C | G | node17          |
| 14280432 | E2a1-V13     | V13_eq     | CTS2374   | Y90916 | G | A | node17          |
| 15134166 | E2a1-V13     | V13_eq     | CTS3726   |        | C | T | node17          |
| 15226328 | E2a1-V13     | V13_eq     | CTS3849.1 |        | T | C | node17          |
| 15944985 | E2a1-V13     | V13_eq     | CTS4993   |        | A | C | node17          |
| 16229691 | E2a1-V13     | V13_eq     | CTS5371   |        | C | A | node17          |
| 16563095 | E2a1-V13     | V13_eq     | CTS5935   |        | G | A | node17          |
| 16744509 | E2a1-V13     | V13_eq     | CTS6229   |        | G | A | node17          |
| 17416901 | E2a1-V13     | V13_eq     | CTS7315   |        | A | G | node17          |
| 17578390 | E2a1-V13     | V13_eq     | CTS7633   |        | C | G | node17          |
| 17818487 | E2a1-V13     | V13_eq     | CTS8061   |        | C | A | node17          |
| 19246289 | E2a1-V13     | V13_eq     | CTS10084  |        | C | T | node17          |
| 21228969 | E2a1-V13     | V13_eq     | FGC11422  | Y3865  | C | A | node17          |
| 14455381 | E2a1-Y37092  | Y37092_eq  |           |        | G | A | node18          |
| 15924910 | E2a1-Y37092  | Y37092_eq  |           | Y95144 | C | G | node18          |
| 16507606 | E2a1-Y37092  | Y37092_eq  | CTS5850   |        | A | G | node18          |
| 21549272 | E2a1-Y37092  | Y37092_eq  |           |        | C | T | node18          |
| 23524057 | E2a1-Y37092  | Y37092     |           | Y37092 | A | G | node18          |
| 7306212  | E2a1-CTS1273 | CTS1273    | CTS1273   |        | C | T | node19          |
| 8897845  | E2a1-CTS1273 | CTS1273_eq | PF2217    |        | G | T | node19          |
| 16509525 | E2a1-CTS1273 | CTS1273_eq | CTS5856   |        | G | A | node19          |
| 19059502 | E2a1-CTS1273 | CTS1273_eq | CTS9761   |        | C | T | node19          |
| 7681503  | E2a1-Z18995  | Z18995     |           |        | T | C | node56          |
| 8450465  | E2a1-Z18995  | Z18995_eq  |           |        | A | G | node56          |
| 15522263 | E2a1-Z18995  | Z18995_eq  |           |        | T | C | node56          |
| 17363772 | E2a1-Z18995  | Z18995_eq  |           |        | G | A | node56          |
| 19143456 | E2a1-Z18995  | Z18995_eq  |           | Y36966 | C | T | node56          |
| 19317259 | E2a1-Z18995  | Z18995_eq  |           |        | T | C | node56          |
| 21441926 | E2a1-Z18995  | Z18995_eq  |           |        | G | A | node56          |
| 21759898 | E2a1-Z18995  | Z18995_eq  |           |        | A | C | node56          |
| 22566420 | E2a1-Z18995  | Z18995_eq  | Z18995    |        | G | A | node56          |
| 8455951  | E2a1-Z38334  | Z38334     | Z38334    |        | C | T | node58          |
| 8495138  | E2a1-Z38334  | Z38334_eq  | BY4643    |        | G | A | node58          |
| 14356759 | E2a1-Z38334  | Z38334_eq  | BY4642    |        | C | A | node58          |
| 15009847 | E2a1-Z38334  | Z38334_eq  | BY4644    |        | A | G | node58          |
| 15562691 | E2a1-Z38334  | Z38334_eq  | BY4645    |        | G | A | node58          |
| 19497714 | E2a1-Z38334  | Z38334_eq  | BY4648    |        | C | G | node58          |
| 21481400 | E2a1-Z38334  | Z38334_eq  | BY4649    |        | G | T | node58          |
| 21594825 | E2a1-Z38334  | Z38334_eq  | BY4650    |        | C | T | node58          |
| 6679194  | E2a1-B415    | B415       | B415      |        | A | C | GS000013763-ASM |
| 7329580  | E2a1-B415    | B415_eq    | Z37881    |        | G | A | GS000013763-ASM |
| 7945389  | E2a1-B415    | B415_eq    | Z37882    |        | C | T | GS000013763-ASM |
| 8250952  | E2a1-B415    | B415_eq    | Z37883    |        | T | A | GS000013763-ASM |
| 8250958  | E2a1-B415    | B415_eq    |           |        | G | A | GS000013763-ASM |
| 14045434 | E2a1-B415    | B415_eq    |           |        | C | A | GS000013763-ASM |
| 14217737 | E2a1-B415    | B415_eq    |           |        | C | T | GS000013763-ASM |

|          |           |         |         |   |   |                 |
|----------|-----------|---------|---------|---|---|-----------------|
| 14897811 | E2a1-B415 | B415_eq |         | T | A | GS000013763-ASM |
| 15209908 | E2a1-B415 | B415_eq |         | C | T | GS000013763-ASM |
| 17843678 | E2a1-B415 | B415_eq |         | A | G | GS000013763-ASM |
| 17886925 | E2a1-B415 | B415_eq |         | T | C | GS000013763-ASM |
| 18839692 | E2a1-B415 | B415_eq |         | T | G | GS000013763-ASM |
| 18983738 | E2a1-B415 | B415_eq |         | C | G | GS000013763-ASM |
| 18984635 | E2a1-B415 | B415_eq |         | C | G | GS000013763-ASM |
| 19130953 | E2a1-B415 | B415_eq |         | C | T | GS000013763-ASM |
| 21567595 | E2a1-B415 | B415_eq |         | G | A | GS000013763-ASM |
| 21750693 | E2a1-B415 | B415_eq |         | A | G | GS000013763-ASM |
| 22570586 | E2a1-B415 | B415_eq |         | T | C | GS000013763-ASM |
| 22710013 | E2a1-B415 | B415_eq |         | C | T | GS000013763-ASM |
| 22817124 | E2a1-B415 | B415_eq |         | G | T | GS000013763-ASM |
| 23166011 | E2a1-B415 | B415_eq |         | A | G | GS000013763-ASM |
| 2843719  | E2a1-B932 | B932    |         | T | A | GRC15560110     |
| 6844449  | E2a1-B932 | B932_eq |         | C | T | GRC15560110     |
| 6919395  | E2a1-B932 | B932_eq |         | T | A | GRC15560110     |
| 7879354  | E2a1-B932 | B932_eq |         | C | T | GRC15560110     |
| 7946865  | E2a1-B932 | B932_eq |         | G | A | GRC15560110     |
| 8219568  | E2a1-B932 | B932_eq |         | A | G | GRC15560110     |
| 8244831  | E2a1-B932 | B932_eq |         | C | T | GRC15560110     |
| 8406954  | E2a1-B932 | B932_eq |         | C | T | GRC15560110     |
| 8616900  | E2a1-B932 | B932_eq | V2363.2 | G | A | GRC15560110     |
| 8743746  | E2a1-B932 | B932_eq |         | A | G | GRC15560110     |
| 8798231  | E2a1-B932 | B932_eq |         | G | A | GRC15560110     |
| 9093409  | E2a1-B932 | B932_eq |         | A | G | GRC15560110     |
| 9398589  | E2a1-B932 | B932_eq |         | T | G | GRC15560110     |
| 9398607  | E2a1-B932 | B932_eq |         | G | T | GRC15560110     |
| 9398630  | E2a1-B932 | B932_eq | A172    | G | A | GRC15560110     |
| 9641040  | E2a1-B932 | B932_eq |         | T | G | GRC15560110     |
| 14085140 | E2a1-B932 | B932_eq |         | T | A | GRC15560110     |
| 14264467 | E2a1-B932 | B932_eq |         | C | G | GRC15560110     |
| 14407508 | E2a1-B932 | B932_eq |         | A | G | GRC15560110     |
| 15145806 | E2a1-B932 | B932_eq |         | G | T | GRC15560110     |
| 15710216 | E2a1-B932 | B932_eq |         | G | A | GRC15560110     |
| 16224112 | E2a1-B932 | B932_eq |         | T | C | GRC15560110     |
| 16407891 | E2a1-B932 | B932_eq |         | G | A | GRC15560110     |
| 16903523 | E2a1-B932 | B932_eq |         | C | A | GRC15560110     |
| 17049608 | E2a1-B932 | B932_eq |         | C | A | GRC15560110     |
| 17206250 | E2a1-B932 | B932_eq |         | G | A | GRC15560110     |
| 17630276 | E2a1-B932 | B932_eq |         | T | A | GRC15560110     |
| 18663526 | E2a1-B932 | B932_eq |         | G | T | GRC15560110     |
| 18689376 | E2a1-B932 | B932_eq |         | T | C | GRC15560110     |
| 18931014 | E2a1-B932 | B932_eq |         | A | T | GRC15560110     |
| 19238371 | E2a1-B932 | B932_eq |         | C | A | GRC15560110     |
| 19342017 | E2a1-B932 | B932_eq |         | G | T | GRC15560110     |
| 19461345 | E2a1-B932 | B932_eq |         | C | T | GRC15560110     |
| 21204679 | E2a1-B932 | B932_eq |         | T | G | GRC15560110     |
| 22004994 | E2a1-B932 | B932_eq |         | G | C | GRC15560110     |
| 22281359 | E2a1-B932 | B932_eq |         | T | G | GRC15560110     |

|          |             |           |         |        |   |   |                    |
|----------|-------------|-----------|---------|--------|---|---|--------------------|
| 22680613 | E2a1-B932   | B932_eq   |         |        | C | T | GRC15560110        |
| 22924752 | E2a1-B932   | B932_eq   |         |        | G | A | GRC15560110        |
| 23033851 | E2a1-B932   | B932_eq   |         |        | T | C | GRC15560110        |
| 23072018 | E2a1-B932   | B932_eq   |         |        | A | G | GRC15560110        |
| 23737770 | E2a1-B932   | B932_eq   |         |        | G | A | GRC15560110        |
| 23975106 | E2a1-B932   | B932_eq   |         |        | G | A | GRC15560110        |
| 6922366  | E2a1-Y7018  | Y7018_eq  | Y7022   | Y7022  | A | G | node40             |
| 7047798  | E2a1-Y7018  | Y7018_eq  |         | Y7017  | T | G | node40             |
| 8405716  | E2a1-Y7018  | Y7018     | Y7018   | Y7018  | A | C | node40             |
| 9760300  | E2a1-Y7018  | Y7018_eq  |         | Y7024  | C | T | node40             |
| 15415045 | E2a1-Y7018  | Y7018_eq  | Y7038   | Y7038  | T | A | node40             |
| 16240321 | E2a1-Y7018  | Y7018_eq  | Y7028   | Y7028  | C | G | node40             |
| 16768120 | E2a1-Y7018  | Y7018_eq  | Y7029   | Y7029  | G | A | node40             |
| 17128987 | E2a1-Y7018  | Y7018_eq  | Y7030   | Y7030  | C | T | node40             |
| 17609135 | E2a1-Y7018  | Y7018_eq  | Y7031   | Y7031  | T | C | node40             |
| 18122091 | E2a1-Y7018  | Y7018_eq  | S3003   |        | C | T | node40             |
| 18867536 | E2a1-Y7018  | Y7018_eq  | Y7032   | Y7032  | C | T | node40             |
| 19320827 | E2a1-Y7018  | Y7018_eq  | Y7033   | Y7033  | G | T | node40             |
| 20811692 | E2a1-Y7018  | Y7018_eq  | Y7034   | Y7034  | G | A | node40             |
| 22094962 | E2a1-Y7018  | Y7018_eq  | S3015   |        | G | C | node40             |
| 22672188 | E2a1-Y7018  | Y7018_eq  |         | Y7019  | C | T | node40             |
| 23138391 | E2a1-Y7018  | Y7018_eq  | Y7020   | Y7020  | T | C | node40             |
| 23331493 | E2a1-Y7018  | Y7018_eq  | Y7039   | Y7039  | G | C | node40             |
| 21742206 | E2a1-B2005  | B2005     |         |        | G | A | node50             |
| 24366475 | E2a1-B2005  | B2005_eq  |         |        | G | A | node50             |
| 6967093  | E2a1-Y7023  | Y7023     | Y7023   | Y7023  | C | T | node43             |
| 15375309 | E2a1-Y7023  | Y7023_eq  | Y7026   | Y7026  | G | A | node43             |
| 17941248 | E2a1-A783   | A783      | A783    |        | C | T | node47             |
| 20819574 | E2a1-A783   | A783_eq   | A1157   | Y31934 | G | T | node47             |
| 8072035  | E2a1-A779   | A779      | A779    |        | A | C | node48             |
| 8863705  | E2a1-A779   | A779_eq   | A780    | Y64634 | G | A | node48             |
| 14045746 | E2a1-A779   | A779_eq   | A781    |        | A | G | node48             |
| 15522186 | E2a1-A779   | A779_eq   | BY5856  |        | A | G | node48             |
| 19469567 | E2a1-A779   | A779_eq   | A784    |        | C | T | node48             |
| 21126057 | E2a1-A779   | A779_eq   | A785    |        | T | G | node48             |
| 21132225 | E2a1-A779   | A779_eq   | A1158   |        | G | A | node48             |
| 6965314  | E2a1-CTS141 | CTS141_eq |         |        | T | C | NA20510-200-37-ASM |
| 7087086  | E2a1-CTS141 | CTS141_eq | CTS919  |        | C | T | NA20510-200-37-ASM |
| 7191663  | E2a1-CTS141 | CTS141_eq | CTS1087 |        | G | A | NA20510-200-37-ASM |
| 7875874  | E2a1-CTS141 | CTS141_eq |         |        | G | A | NA20510-200-37-ASM |
| 8883886  | E2a1-CTS141 | CTS141_eq |         |        | C | T | NA20510-200-37-ASM |
| 9086214  | E2a1-CTS141 | CTS141_eq |         |        | T | C | NA20510-200-37-ASM |
| 14486267 | E2a1-CTS141 | CTS141_eq | CTS2791 |        | C | T | NA20510-200-37-ASM |
| 14970165 | E2a1-CTS141 | CTS141_eq |         |        | A | G | NA20510-200-37-ASM |
| 15274045 | E2a1-CTS141 | CTS141_eq | CTS3927 |        | T | C | NA20510-200-37-ASM |
| 16203886 | E2a1-CTS141 | CTS141_eq |         |        | C | G | NA20510-200-37-ASM |
| 16222390 | E2a1-CTS141 | CTS141_eq |         |        | C | G | NA20510-200-37-ASM |
| 16298631 | E2a1-CTS141 | CTS141_eq |         |        | A | T | NA20510-200-37-ASM |
| 17758652 | E2a1-CTS141 | CTS141_eq |         |        | G | T | NA20510-200-37-ASM |
| 17986487 | E2a1-CTS141 | CTS141_eq |         |        | C | A | NA20510-200-37-ASM |

|          |              |            |          |       |   |   |                    |
|----------|--------------|------------|----------|-------|---|---|--------------------|
| 18750341 | E2a1-CTS141  | CTS141_eq  | CTS9208  |       | A | C | NA20510-200-37-ASM |
| 20819923 | E2a1-CTS141  | CTS141_eq  |          |       | T | C | NA20510-200-37-ASM |
| 21341438 | E2a1-CTS141  | CTS141_eq  |          |       | C | A | NA20510-200-37-ASM |
| 21573335 | E2a1-CTS141  | CTS141_eq  |          |       | T | G | NA20510-200-37-ASM |
| 23751323 | E2a1-CTS141  | CTS141_eq  |          |       | T | C | NA20510-200-37-ASM |
| 7741276  | E2a1-BY7443  | BY7443     | BY7443   |       | C | T | node39             |
| 14314417 | E2a1-BY7443  | BY7443_eq  |          |       | T | A | node39             |
| 24452871 | E2a1-BY7443  | BY7443_eq  |          |       | C | T | node39             |
| 6886317  | E2a1-PR4600  | PR4600     | Z36876   |       | C | A | GS000016441-ASM    |
| 7970947  | E2a1-PR4600  | PR4600_eq  | Z36879   |       | T | G | GS000016441-ASM    |
| 8029071  | E2a1-PR4600  | PR4600_eq  | Z36880   |       | T | C | GS000016441-ASM    |
| 8090452  | E2a1-PR4600  | PR4600_eq  |          |       | G | A | GS000016441-ASM    |
| 8203114  | E2a1-PR4600  | PR4600_eq  |          |       | C | A | GS000016441-ASM    |
| 8403816  | E2a1-PR4600  | PR4600_eq  |          |       | G | A | GS000016441-ASM    |
| 9831546  | E2a1-PR4600  | PR4600_eq  |          |       | C | T | GS000016441-ASM    |
| 14003637 | E2a1-PR4600  | PR4600_eq  |          |       | A | C | GS000016441-ASM    |
| 15449010 | E2a1-PR4600  | PR4600_eq  |          |       | A | T | GS000016441-ASM    |
| 17007223 | E2a1-PR4600  | PR4600_eq  |          |       | A | T | GS000016441-ASM    |
| 17614803 | E2a1-PR4600  | PR4600_eq  |          |       | A | T | GS000016441-ASM    |
| 17977187 | E2a1-PR4600  | PR4600_eq  |          |       | G | A | GS000016441-ASM    |
| 18614655 | E2a1-PR4600  | PR4600_eq  |          |       | G | A | GS000016441-ASM    |
| 19106257 | E2a1-PR4600  | PR4600_eq  |          |       | G | T | GS000016441-ASM    |
| 19332005 | E2a1-PR4600  | PR4600_eq  |          |       | A | G | GS000016441-ASM    |
| 19376372 | E2a1-PR4600  | PR4600_eq  |          |       | T | C | GS000016441-ASM    |
| 21826330 | E2a1-PR4600  | PR4600_eq  |          |       | T | C | GS000016441-ASM    |
| 22582457 | E2a1-PR4600  | PR4600_eq  |          |       | C | T | GS000016441-ASM    |
| 23132054 | E2a1-PR4600  | PR4600_eq  |          |       | G | A | GS000016441-ASM    |
| 9419376  | E2a1-Y3762   | Y3762      | S12376   |       | T | C | node20             |
| 23627617 | E2a1-Y3762   | Y3762_eq   | SK888    | Y3762 | C | T | node20             |
| 6746212  | E2a1-BY4600  | BY4600     | BY4600   |       | G | A | node27             |
| 7520481  | E2a1-BY4600  | BY4600_eq  | BY4606   |       | T | C | node27             |
| 14460190 | E2a1-BY4600  | BY4600_eq  | BY4609   |       | T | G | node27             |
| 16365269 | E2a1-BY4600  | BY4600_eq  | BY4584   |       | A | C | node27             |
| 18781587 | E2a1-BY4600  | BY4600_eq  | BY4602   |       | G | T | node27             |
| 19058185 | E2a1-BY4600  | BY4600_eq  | BY4603   |       | G | T | node27             |
| 19279012 | E2a1-BY4600  | BY4600_eq  | BY4604   |       | G | T | node27             |
| 14150389 | E2a1-CTS2001 | CTS2001    | CTS2001  |       | G | C | node21             |
| 16863579 | E2a1-CTS2001 | CTS2001_eq | CTS6377  |       | A | G | node21             |
| 17818226 | E2a1-CTS2001 | CTS2001_eq | S20250   |       | G | A | node21             |
| 17831354 | E2a1-CTS2001 | CTS2001_eq | CTS8092  |       | G | A | node21             |
| 18820189 | E2a1-CTS2001 | CTS2001_eq | CTS9320  |       | T | C | node21             |
| 23746303 | E2a1-CTS2001 | CTS2001_eq | FGC36575 | Y3761 | C | A | node21             |
| 23981470 | E2a1-CTS2001 | CTS2001_eq | S26015   |       | G | A | node21             |
| 18387345 | E2a1-Z17107  | Z17107     | Z17107   |       | C | T | node25             |
| 23410889 | E2a1-Z17107  | Z17107_eq  | BY4425   |       | C | T | node25             |
| 14345567 | E2a1-BY4281  | BY4281     | BY4281   |       | T | C | node24             |
| 16633337 | E2a1-BY4281  | BY4281_eq  | BY4330   |       | G | A | node24             |
| 15420516 | E2a1-B2004   | B2004      |          |       | C | T | node23             |
| 19312066 | E2a1-B2004   | B2004_eq   |          |       | A | T | node23             |
| 14211447 | E2a1-S7461   | S7461_eq   | A8612    |       | C | T | node29             |

|          |              |            |        |         |   |   |             |
|----------|--------------|------------|--------|---------|---|---|-------------|
| 17669148 | E2a1-S7461   | S7461_eq   | BY5023 | Y19357  | C | A | node29      |
| 24357328 | E2a1-S7461   | S7461      | S7461  |         | T | C | node29      |
| 2876055  | E2a1-Y112162 | Y112162_eq |        |         | C | T | node38      |
| 6426817  | E2a1-Y112162 | Y112162_eq |        |         | G | C | node38      |
| 6653219  | E2a1-Y112162 | Y112162_eq |        |         | A | G | node38      |
| 7533615  | E2a1-Y112162 | Y112162_eq |        |         | T | C | node38      |
| 7607707  | E2a1-Y112162 | Y112162_eq |        |         | A | G | node38      |
| 7644631  | E2a1-Y112162 | Y112162_eq |        |         | G | A | node38      |
| 8148851  | E2a1-Y112162 | Y112162_eq |        |         | G | A | node38      |
| 8715673  | E2a1-Y112162 | Y112162_eq |        |         | C | T | node38      |
| 9114071  | E2a1-Y112162 | Y112162_eq |        |         | C | T | node38      |
| 14193706 | E2a1-Y112162 | Y112162_eq |        |         | G | T | node38      |
| 15742846 | E2a1-Y112162 | Y112162_eq |        |         | C | T | node38      |
| 15940538 | E2a1-Y112162 | Y112162_eq |        |         | C | T | node38      |
| 15950681 | E2a1-Y112162 | Y112162_eq |        |         | G | T | node38      |
| 16176234 | E2a1-Y112162 | Y112162_eq |        |         | T | G | node38      |
| 16732166 | E2a1-Y112162 | Y112162_eq |        |         | G | A | node38      |
| 18598300 | E2a1-Y112162 | Y112162_eq |        |         | T | C | node38      |
| 18600204 | E2a1-Y112162 | Y112162_eq |        |         | T | C | node38      |
| 19441148 | E2a1-Y112162 | Y112162_eq |        |         | C | A | node38      |
| 21333359 | E2a1-Y112162 | Y112162_eq |        |         | T | C | node38      |
| 21390128 | E2a1-Y112162 | Y112162_eq |        |         | G | A | node38      |
| 22035994 | E2a1-Y112162 | Y112162_eq |        |         | G | A | node38      |
| 22899033 | E2a1-Y112162 | Y112162_eq |        |         | C | A | node38      |
| 23269255 | E2a1-Y112162 | Y112162_eq |        |         | A | G | node38      |
| 23385232 | E2a1-Y112162 | Y112162_eq |        |         | A | G | node38      |
| 23729885 | E2a1-Y112162 | Y112162    |        | Y112162 | A | G | node38      |
| 24436419 | E2a1-Y112162 | Y112162_eq |        |         | G | A | node38      |
| 6766481  | E2a1-B1079   | B1079      |        |         | T | C | GRC15560113 |
| 7068530  | E2a1-B1079   | B1079_eq   |        |         | T | C | GRC15560113 |
| 15692508 | E2a1-B1079   | B1079_eq   |        |         | T | C | GRC15560113 |
| 14198950 | E2a1-B1080   | B1080      |        |         | C | T | GRC15560124 |
| 14663524 | E2a1-B1080   | B1080_eq   |        |         | T | C | GRC15560124 |
| 16961635 | E2a1-B1080   | B1080_eq   |        |         | T | A | GRC15560124 |
| 16961641 | E2a1-B1080   | B1080_eq   |        |         | C | T | GRC15560124 |
| 19225360 | E2a1-B1080   | B1080_eq   |        |         | T | C | GRC15560124 |
| 20838284 | E2a1-B1080   | B1080_eq   |        |         | T | C | GRC15560124 |
| 6705058  | E2a1-BY5150  | BY5150_eq  |        |         | C | T | node37      |
| 6839180  | E2a1-BY5150  | BY5150_eq  |        |         | A | G | node37      |
| 6906707  | E2a1-BY5150  | BY5150_eq  |        |         | A | G | node37      |
| 8206672  | E2a1-BY5150  | BY5150_eq  |        |         | A | G | node37      |
| 8777942  | E2a1-BY5150  | BY5150_eq  |        |         | A | G | node37      |
| 8866530  | E2a1-BY5150  | BY5150_eq  |        |         | G | A | node37      |
| 14095973 | E2a1-BY5150  | BY5150_eq  |        |         | G | A | node37      |
| 14233702 | E2a1-BY5150  | BY5150_eq  |        |         | C | T | node37      |
| 14769579 | E2a1-BY5150  | BY5150_eq  |        |         | C | A | node37      |
| 15174755 | E2a1-BY5150  | BY5150_eq  |        |         | G | A | node37      |
| 16051558 | E2a1-BY5150  | BY5150_eq  |        |         | G | A | node37      |
| 16178636 | E2a1-BY5150  | BY5150_eq  |        |         | T | G | node37      |
| 16350048 | E2a1-BY5150  | BY5150     | BY5150 |         | C | T | node37      |



|          |             |           |          |        |   |             |        |
|----------|-------------|-----------|----------|--------|---|-------------|--------|
| 16861941 | E2a1-BY5150 | BY5150_eq |          | A      | G | node37      |        |
| 17868979 | E2a1-BY5150 | BY5150_eq |          | C      | A | node37      |        |
| 17896838 | E2a1-BY5150 | BY5150_eq |          | T      | C | node37      |        |
| 18250924 | E2a1-BY5150 | BY5150_eq | Y35954   | C      | A | node37      |        |
| 18250927 | E2a1-BY5150 | BY5150_eq | Y35955   | A      | G | node37      |        |
| 19258100 | E2a1-BY5150 | BY5150_eq |          | T      | C | node37      |        |
| 19334206 | E2a1-BY5150 | BY5150_eq |          | C      | T | node37      |        |
| 21344039 | E2a1-BY5150 | BY5150_eq |          | G      | A | node37      |        |
| 21467277 | E2a1-BY5150 | BY5150_eq |          | A      | G | node37      |        |
| 21952618 | E2a1-BY5150 | BY5150_eq |          | T      | C | node37      |        |
| 23031597 | E2a1-BY5150 | BY5150_eq |          | C      | T | node37      |        |
| 23506588 | E2a1-BY5150 | BY5150_eq |          | G      | A | node37      |        |
| 6702612  | E2a1-Y28220 | Y28220_eq |          | C      | G | node32      |        |
| 6794929  | E2a1-Y28220 | Y28220_eq |          | G      | T | node32      |        |
| 6895930  | E2a1-Y28220 | Y28220_eq |          | T      | C | node32      |        |
| 7756476  | E2a1-Y28220 | Y28220_eq |          | C      | A | node32      |        |
| 8511690  | E2a1-Y28220 | Y28220_eq |          | C      | A | node32      |        |
| 9402421  | E2a1-Y28220 | Y28220_eq |          | A      | T | node32      |        |
| 9865938  | E2a1-Y28220 | Y28220_eq |          | C      | T | node32      |        |
| 14001146 | E2a1-Y28220 | Y28220_eq |          | A      | G | node32      |        |
| 14418231 | E2a1-Y28220 | Y28220_eq |          | A      | G | node32      |        |
| 15072445 | E2a1-Y28220 | Y28220_eq |          | T      | C | node32      |        |
| 15079287 | E2a1-Y28220 | Y28220_eq |          | C      | T | node32      |        |
| 16659660 | E2a1-Y28220 | Y28220_eq |          | G      | A | node32      |        |
| 17279571 | E2a1-Y28220 | Y28220_eq |          | A      | C | node32      |        |
| 17577643 | E2a1-Y28220 | Y28220_eq |          | T      | G | node32      |        |
| 21035448 | E2a1-Y28220 | Y28220_eq | FGC42973 | G      | A | node32      |        |
| 21210293 | E2a1-Y28220 | Y28220_eq |          | A      | C | node32      |        |
| 21306341 | E2a1-Y28220 | Y28220_eq |          | C      | A | node32      |        |
| 21614242 | E2a1-Y28220 | Y28220_eq |          | C      | A | node32      |        |
| 23654401 | E2a1-Y28220 | Y28220    | Y28220   | G      | A | node32      |        |
| 24873761 | E2a1-Y28220 | Y28220_eq |          | C      | T | node32      |        |
| 21834905 | E2a1-B1091  | B1091     | S2979    | G      | T | node60      |        |
| 15626083 | E2a1-B476   | B476      | Z16659   | A      | C | node61      |        |
| 7032754  | E2a1-Y3183  | Y3183     | Y3183    | Y3183  | C | G           | node66 |
| 18802520 | E2a1-Y3183  | Y3183_eq  | S2972    | G      | A | node66      |        |
| 19534963 | E2a1-Y3183  | Y3183_eq  | Z16660   | C      | G | node66      |        |
| 17529506 | E2a1-Y18676 | Y18676    | Y18676   | Y18676 | T | G           | node67 |
| 18655511 | E2a1-Y18676 | Y18676_eq | A7135    | A      | G | node67      |        |
| 21326389 | E2a1-Y18676 | Y18676_eq | A7136    | G      | A | node67      |        |
| 22302885 | E2a1-Y18676 | Y18676_eq |          | Y18674 | G | T           | node67 |
| 14308694 | E2a1-Z21357 | Z21357    | Z21357   | G      | A | node63      |        |
| 17872452 | E2a1-Z21357 | Z21357_eq | S20329   | C      | T | node63      |        |
| 19023060 | E2a1-Z21357 | Z21357_eq | Z21363   | T      | C | node63      |        |
| 2877779  | E2a1-Y33737 | Y33737_eq |          | G      | A | GRC15560154 |        |
| 6965761  | E2a1-Y33737 | Y33737_eq |          | C      | A | GRC15560154 |        |
| 7206470  | E2a1-Y33737 | Y33737_eq |          | C      | T | GRC15560154 |        |
| 7716006  | E2a1-Y33737 | Y33737_eq |          | C      | T | GRC15560154 |        |
| 8718669  | E2a1-Y33737 | Y33737_eq |          | G      | T | GRC15560154 |        |
| 9894847  | E2a1-Y33737 | Y33737_eq |          | T      | A | GRC15560154 |        |

|          |             |           |          |        |   |   |                 |
|----------|-------------|-----------|----------|--------|---|---|-----------------|
| 16912227 | E2a1-Y33737 | Y33737_eq |          |        | T | C | GRC15560154     |
| 17924032 | E2a1-Y33737 | Y33737    | Y33737   | Y33737 | G | A | GRC15560154     |
| 18046948 | E2a1-Y33737 | Y33737_eq |          |        | A | C | GRC15560154     |
| 18750909 | E2a1-Y33737 | Y33737_eq | YP1378   | YP1378 | T | A | GRC15560154     |
| 19061573 | E2a1-Y33737 | Y33737_eq |          |        | C | A | GRC15560154     |
| 21366581 | E2a1-Y33737 | Y33737_eq |          |        | C | T | GRC15560154     |
| 21662394 | E2a1-Y33737 | Y33737_eq |          |        | C | T | GRC15560154     |
| 24483843 | E2a1-Y33737 | Y33737_eq |          |        | C | T | GRC15560154     |
| 7220584  | E2a1-B414   | B414      | B414     |        | G | A | node64          |
| 8102727  | E2a1-B414   | B414_eq   | BY5503   | Y19525 | A | C | node64          |
| 17135027 | E2a1-B414   | B414_eq   | Z38769   |        | G | A | node64          |
| 17445266 | E2a1-B414   | B414_eq   | BY5510   | Y19528 | C | G | node64          |
| 21881219 | E2a1-B414   | B414_eq   | BY5520   | Y19524 | T | C | node64          |
| 22697391 | E2a1-B414   | B414_eq   | Z38770   |        | A | G | node64          |
| 24400140 | E2a1-B414   | B414_eq   | PF4882   |        | T | C | node64          |
| 7709197  | E2a1-B1093  | B1093     |          |        | C | T | node65          |
| 14192646 | E2a1-B1093  | B1093_eq  |          |        | T | C | node65          |
| 15519794 | E2a1-B1093  | B1093_eq  |          |        | G | C | node65          |
| 16811083 | E2a1-B1093  | B1093_eq  |          |        | T | G | node65          |
| 17663216 | E2a1-B1093  | B1093_eq  |          |        | C | T | node65          |
| 17971947 | E2a1-B1093  | B1093_eq  |          |        | T | A | node65          |
| 21488350 | E2a1-B1093  | B1093_eq  |          |        | C | A | node65          |
| 22584163 | E2a1-B1093  | B1093_eq  |          |        | A | G | node65          |
| 22959420 | E2a1-B1093  | B1093_eq  |          |        | C | T | node65          |
| 23443522 | E2a1-B1093  | B1093_eq  |          |        | C | A | node65          |
| 15994261 | E2a1-B409   | B409_eq   | FGC11451 | Y14129 | A | G | node68          |
| 23067493 | E2a1-B409   | B409      | B409     | Y13926 | C | T | node68          |
| 23240327 | E2a1-B409   | B409_eq   | FGC11457 | Y14130 | C | T | node68          |
| 15994261 | E2a1-B409   | B409_eq   | FGC11451 | Y14129 | A | G | node68          |
| 23067493 | E2a1-B409   | B409      | B409     | Y13926 | C | T | node68          |
| 23240327 | E2a1-B409   | B409_eq   | FGC11457 | Y14130 | C | T | node68          |
| 6668236  | E2a1-B412   | B412      | B412     |        | A | G | GS000035021-ASM |
| 8432791  | E2a1-B412   | B412_eq   |          |        | G | T | GS000035021-ASM |
| 14253900 | E2a1-B412   | B412_eq   | Z37873   |        | G | T | GS000035021-ASM |
| 14308970 | E2a1-B412   | B412_eq   | Z37874   |        | A | G | GS000035021-ASM |
| 14453459 | E2a1-B412   | B412_eq   | Z37875   |        | A | G | GS000035021-ASM |
| 15642303 | E2a1-B412   | B412_eq   |          |        | T | G | GS000035021-ASM |
| 15868828 | E2a1-B412   | B412_eq   |          |        | G | A | GS000035021-ASM |
| 16061470 | E2a1-B412   | B412_eq   |          |        | T | C | GS000035021-ASM |
| 17100236 | E2a1-B412   | B412_eq   |          |        | G | T | GS000035021-ASM |
| 17236116 | E2a1-B412   | B412_eq   |          |        | A | C | GS000035021-ASM |
| 23069249 | E2a1-B412   | B412_eq   |          |        | T | G | GS000035021-ASM |
| 24071400 | E2a1-B412   | B412_eq   |          |        | A | T | GS000035021-ASM |
| 4567341  | E2a1-Z37869 | Z37869_eq |          |        | C | A | node74          |
| 7106942  | E2a1-Z37869 | Z37869    | Z37869   |        | G | A | node74          |
| 7609187  | E2a1-Z37869 | Z37869_eq | Z37870   |        | G | C | node74          |
| 7989406  | E2a1-Z37869 | Z37869_eq | Z37871   |        | T | A | node74          |
| 9648097  | E2a1-Z37869 | Z37869_eq |          |        | T | A | node74          |
| 14834926 | E2a1-Z37869 | Z37869_eq |          |        | A | G | node74          |
| 15610952 | E2a1-Z37869 | Z37869_eq |          |        | C | G | node74          |

|          |             |           |         |   |   |                 |
|----------|-------------|-----------|---------|---|---|-----------------|
| 17271514 | E2a1-Z37869 | Z37869_eq |         | G | A | node74          |
| 17673416 | E2a1-Z37869 | Z37869_eq |         | G | C | node74          |
| 18173834 | E2a1-Z37869 | Z37869_eq |         | C | T | node74          |
| 18841774 | E2a1-Z37869 | Z37869_eq |         | T | C | node74          |
| 20827875 | E2a1-Z37869 | Z37869_eq |         | G | A | node74          |
| 21185722 | E2a1-Z37869 | Z37869_eq |         | A | G | node74          |
| 8649703  | E2a1-B410   | B410      |         | G | A | GS000017206-ASM |
| 16203014 | E2a1-B410   | B410_eq   |         | T | C | GS000017206-ASM |
| 16220441 | E2a1-B410   | B410_eq   |         | T | G | GS000017206-ASM |
| 19116617 | E2a1-B410   | B410_eq   |         | G | C | GS000017206-ASM |
| 23962621 | E2a1-B410   | B410_eq   |         | T | G | GS000017206-ASM |
| 7290454  | E2b'c       | Z827      | CTS1243 | G | C | node80          |
| 22557810 | E2b'c       | Z827_eq   | M5323   | C | A | node80          |
| 2710013  | E2c         | L335      | L335    | A | G | node122         |
| 7234609  | E2c         | L335_eq   |         | C | T | node122         |
| 7322178  | E2c         | L335_eq   | CTS1303 | C | T | node122         |
| 7432723  | E2c         | L335_eq   | CTS1483 | G | A | node122         |
| 7682321  | E2c         | L335_eq   | PF2319  | G | A | node122         |
| 8132579  | E2c         | L335_eq   | M5086   | G | A | node122         |
| 8134356  | E2c         | L335_eq   | M5087   | C | T | node122         |
| 8407831  | E2c         | L335_eq   | PF2321  | T | G | node122         |
| 8438286  | E2c         | L335_eq   | M5096   | C | T | node122         |
| 8871735  | E2c         | L335_eq   | M5107   | A | G | node122         |
| 14109025 | E2c         | L335_eq   | CTS1883 | C | A | node122         |
| 14253637 | E2c         | L335_eq   |         | T | G | node122         |
| 14320818 | E2c         | L335_eq   | CTS2473 | G | A | node122         |
| 14541624 | E2c         | L335_eq   | CTS2885 | A | C | node122         |
| 14817699 | E2c         | L335_eq   | CTS3305 | C | A | node122         |
| 15085950 | E2c         | L335_eq   | CTS3633 | A | C | node122         |
| 15384898 | E2c         | L335_eq   | CTS4084 | T | G | node122         |
| 15452759 | E2c         | L335_eq   | CTS4176 | G | A | node122         |
| 15512696 | E2c         | L335_eq   | CTS4247 | G | A | node122         |
| 15879807 | E2c         | L335_eq   | CTS4867 | T | C | node122         |
| 16223362 | E2c         | L335_eq   | CTS5359 | A | T | node122         |
| 16390272 | E2c         | L335_eq   | CTS5604 | T | A | node122         |
| 16899460 | E2c         | L335_eq   | CTS6444 | T | G | node122         |
| 17091865 | E2c         | L335_eq   | CTS6754 | G | A | node122         |
| 17118046 | E2c         | L335_eq   | CTS6806 | C | T | node122         |
| 17190078 | E2c         | L335_eq   | CTS6911 | T | C | node122         |
| 17210606 | E2c         | L335_eq   | CTS6956 | C | T | node122         |
| 17218063 | E2c         | L335_eq   | CTS6976 | A | C | node122         |
| 17235818 | E2c         | L335_eq   | CTS7014 | T | C | node122         |
| 17486942 | E2c         | L335_eq   | CTS7451 | C | G | node122         |
| 17670232 | E2c         | L335_eq   | CTS7795 | A | G | node122         |
| 17670258 | E2c         | L335_eq   | CTS7796 | T | C | node122         |
| 17707097 | E2c         | L335_eq   | CTS7853 | T | C | node122         |
| 17951084 | E2c         | L335_eq   |         | A | G | node122         |
| 18128763 | E2c         | L335_eq   | CTS8649 | G | A | node122         |
| 18416012 | E2c         | L335_eq   | PF2382  | T | C | node122         |
| 18419547 | E2c         | L335_eq   | PF2383  | A | G | node122         |

|          |              |             |          |        |   |   |             |
|----------|--------------|-------------|----------|--------|---|---|-------------|
| 18749043 | E2c          | L335_eq     | CTS9204  |        | C | T | node122     |
| 19119266 | E2c          | L335_eq     | M5271    |        | G | A | node122     |
| 19193159 | E2c          | L335_eq     | M5272    |        | G | A | node122     |
| 19453727 | E2c          | L335_eq     | CTS10433 |        | C | G | node122     |
| 19475462 | E2c          | L335_eq     | CTS10477 |        | G | A | node122     |
| 21066342 | E2c          | L335_eq     | M5285    |        | A | G | node122     |
| 21299917 | E2c          | L335_eq     | M5289    |        | G | A | node122     |
| 21397600 | E2c          | L335_eq     | M5298    |        | A | C | node122     |
| 21508604 | E2c          | L335_eq     | M5042    |        | T | A | node122     |
| 21807861 | E2c          | L335_eq     | M5310    |        | C | A | node122     |
| 21989906 | E2c          | L335_eq     | M5317    |        | A | T | node122     |
| 22023773 | E2c          | L335_eq     | M5319    |        | A | G | node122     |
| 22233084 | E2c          | L335_eq     |          | Y7120  | C | T | node122     |
| 22751863 | E2c          | L335_eq     | M310.1   |        | C | T | node122     |
| 23314799 | E2c          | L335_eq     | M5354    |        | T | G | node122     |
| 23367445 | E2c          | L335_eq     | CTS11929 |        | T | C | node122     |
| 23385983 | E2c          | L335_eq     | CTS11964 |        | G | A | node122     |
| 23809883 | E2c          | L335_eq     | M5050    |        | C | T | node122     |
| 23976740 | E2c          | L335_eq     | M5366    |        | C | G | node122     |
| 24396804 | E2c          | L335_eq     | M5367    |        | G | A | node122     |
| 2849444  | E2c-FGC29278 | FGC29278_eq | FGC18907 | Y10526 | A | T | GRC15560109 |
| 6619943  | E2c-FGC29278 | FGC29278_eq |          |        | C | T | GRC15560109 |
| 6630265  | E2c-FGC29278 | FGC29278_eq |          |        | C | G | GRC15560109 |
| 6913925  | E2c-FGC29278 | FGC29278_eq |          |        | A | G | GRC15560109 |
| 6980402  | E2c-FGC29278 | FGC29278_eq | FGC18919 | Y10541 | A | T | GRC15560109 |
| 7031971  | E2c-FGC29278 | FGC29278_eq | FGC18951 |        | C | T | GRC15560109 |
| 7358947  | E2c-FGC29278 | FGC29278_eq |          |        | C | G | GRC15560109 |
| 7510439  | E2c-FGC29278 | FGC29278_eq | FGC18954 |        | G | A | GRC15560109 |
| 7717565  | E2c-FGC29278 | FGC29278_eq | Y11300   | Y11300 | C | T | GRC15560109 |
| 7915107  | E2c-FGC29278 | FGC29278_eq | FGC18957 |        | G | A | GRC15560109 |
| 7953646  | E2c-FGC29278 | FGC29278_eq | Y10545   | Y10545 | T | A | GRC15560109 |
| 7953668  | E2c-FGC29278 | FGC29278_eq | Y10546   | Y10546 | C | G | GRC15560109 |
| 8240076  | E2c-FGC29278 | FGC29278_eq |          |        | G | T | GRC15560109 |
| 8299572  | E2c-FGC29278 | FGC29278_eq | FGC18905 | Y10547 | C | A | GRC15560109 |
| 8566810  | E2c-FGC29278 | FGC29278_eq | Y10528   | Y10528 | G | A | GRC15560109 |
| 8866311  | E2c-FGC29278 | FGC29278_eq | FGC18927 | Y10548 | A | T | GRC15560109 |
| 8871301  | E2c-FGC29278 | FGC29278_eq | PF2431   |        | G | A | GRC15560109 |
| 9013535  | E2c-FGC29278 | FGC29278_eq |          |        | G | A | GRC15560109 |
| 9160926  | E2c-FGC29278 | FGC29278_eq |          |        | C | T | GRC15560109 |
| 9436273  | E2c-FGC29278 | FGC29278_eq |          |        | G | A | GRC15560109 |
| 9823657  | E2c-FGC29278 | FGC29278_eq | PF3985   |        | A | T | GRC15560109 |
| 9882218  | E2c-FGC29278 | FGC29278_eq |          | Y12494 | G | A | GRC15560109 |
| 9898590  | E2c-FGC29278 | FGC29278_eq |          |        | T | A | GRC15560109 |
| 14054728 | E2c-FGC29278 | FGC29278_eq | FGC18890 | Y11575 | T | C | GRC15560109 |
| 14150016 | E2c-FGC29278 | FGC29278_eq | FGC18921 | Y11577 | G | T | GRC15560109 |
| 14238224 | E2c-FGC29278 | FGC29278_eq | PF2436   |        | C | G | GRC15560109 |
| 14242423 | E2c-FGC29278 | FGC29278_eq |          |        | A | G | GRC15560109 |
| 14388965 | E2c-FGC29278 | FGC29278_eq |          |        | G | A | GRC15560109 |
| 14588776 | E2c-FGC29278 | FGC29278_eq |          |        | T | C | GRC15560109 |
| 14618515 | E2c-FGC29278 | FGC29278_eq |          |        | A | G | GRC15560109 |

|          |                          |           |         |   |   |             |
|----------|--------------------------|-----------|---------|---|---|-------------|
| 14624246 | E2c-FGC29278 FGC29278_eq | Y17625    | Y17625  | G | A | GRC15560109 |
| 14710005 | E2c-FGC29278 FGC29278_eq | Y10549    | Y10549  | G | T | GRC15560109 |
| 14800387 | E2c-FGC29278 FGC29278_eq | PF2441    |         | G | C | GRC15560109 |
| 14840425 | E2c-FGC29278 FGC29278_eq |           |         | G | A | GRC15560109 |
| 15084879 | E2c-FGC29278 FGC29278_eq | FGC18911  | Y10550  | G | C | GRC15560109 |
| 15174468 | E2c-FGC29278 FGC29278_eq |           |         | A | G | GRC15560109 |
| 15350388 | E2c-FGC29278 FGC29278_eq |           |         | A | G | GRC15560109 |
| 15409320 | E2c-FGC29278 FGC29278_eq | FGC18973  |         | A | G | GRC15560109 |
| 15874923 | E2c-FGC29278 FGC29278_eq |           |         | T | C | GRC15560109 |
| 16070411 | E2c-FGC29278 FGC29278_eq |           |         | G | A | GRC15560109 |
| 16202753 | E2c-FGC29278 FGC29278_eq | FGC18976  |         | T | C | GRC15560109 |
| 16203960 | E2c-FGC29278 FGC29278_eq |           |         | A | G | GRC15560109 |
| 16488587 | E2c-FGC29278 FGC29278_eq | PF2442    |         | G | A | GRC15560109 |
| 16641572 | E2c-FGC29278 FGC29278_eq |           |         | G | C | GRC15560109 |
| 16819048 | E2c-FGC29278 FGC29278_eq |           |         | A | G | GRC15560109 |
| 16839669 | E2c-FGC29278 FGC29278_eq | PH2592    | Y11579  | C | A | GRC15560109 |
| 16918470 | E2c-FGC29278 FGC29278_eq |           |         | A | T | GRC15560109 |
| 17086229 | E2c-FGC29278 FGC29278_eq | FGC18982  |         | T | A | GRC15560109 |
| 17101076 | E2c-FGC29278 FGC29278_eq | FGC18889  | Y10532  | G | C | GRC15560109 |
| 17362456 | E2c-FGC29278 FGC29278_eq | FGC18894  |         | C | A | GRC15560109 |
| 17403162 | E2c-FGC29278 FGC29278_eq |           |         | A | G | GRC15560109 |
| 17553953 | E2c-FGC29278 FGC29278_eq |           |         | G | A | GRC15560109 |
| 17588294 | E2c-FGC29278 FGC29278_eq |           |         | T | C | GRC15560109 |
| 17680974 | E2c-FGC29278 FGC29278_eq |           |         | G | A | GRC15560109 |
| 17710363 | E2c-FGC29278 FGC29278_eq | FGC18893  | Y10533  | C | T | GRC15560109 |
| 17791857 | E2c-FGC29278 FGC29278_eq |           |         | C | T | GRC15560109 |
| 17807438 | E2c-FGC29278 FGC29278_eq | FGC18989  |         | G | A | GRC15560109 |
| 17947776 | E2c-FGC29278 FGC29278_eq | FGC18886^ | Y10534  | G | A | GRC15560109 |
| 17963328 | E2c-FGC29278 FGC29278_eq |           |         | A | G | GRC15560109 |
| 18017960 | E2c-FGC29278 FGC29278_eq |           |         | T | C | GRC15560109 |
| 18549211 | E2c-FGC29278 FGC29278    | FGC29278  | Y11580  | C | T | GRC15560109 |
| 18634525 | E2c-FGC29278 FGC29278_eq |           |         | T | C | GRC15560109 |
| 18666182 | E2c-FGC29278 FGC29278_eq | FGC18924  | Y10552  | G | A | GRC15560109 |
| 18908841 | E2c-FGC29278 FGC29278_eq |           |         | G | T | GRC15560109 |
| 19225098 | E2c-FGC29278 FGC29278_eq | FGC18935  | Y10553  | A | T | GRC15560109 |
| 19395442 | E2c-FGC29278 FGC29278_eq | FGC18995  | Y104604 | G | T | GRC15560109 |
| 19414326 | E2c-FGC29278 FGC29278_eq |           |         | A | G | GRC15560109 |
| 19534840 | E2c-FGC29278 FGC29278_eq |           |         | G | A | GRC15560109 |
| 21138770 | E2c-FGC29278 FGC29278_eq |           |         | A | G | GRC15560109 |
| 21150479 | E2c-FGC29278 FGC29278_eq | FGC18938  | Y10554  | T | C | GRC15560109 |
| 21200368 | E2c-FGC29278 FGC29278_eq | FGC18932  | Y10555  | G | T | GRC15560109 |
| 21560394 | E2c-FGC29278 FGC29278_eq |           |         | T | A | GRC15560109 |
| 21564098 | E2c-FGC29278 FGC29278_eq | FGC19001  |         | A | T | GRC15560109 |
| 22471516 | E2c-FGC29278 FGC29278_eq |           |         | G | T | GRC15560109 |
| 22671180 | E2c-FGC29278 FGC29278_eq | FGC18900  | Y10535  | C | A | GRC15560109 |
| 22732140 | E2c-FGC29278 FGC29278_eq | FGC18892  | Y10536  | G | A | GRC15560109 |
| 22821793 | E2c-FGC29278 FGC29278_eq | FGC19009  |         | C | A | GRC15560109 |
| 22832015 | E2c-FGC29278 FGC29278_eq |           | Y10557  | T | A | GRC15560109 |
| 22920663 | E2c-FGC29278 FGC29278_eq | BY9865    |         | G | C | GRC15560109 |
| 23203259 | E2c-FGC29278 FGC29278_eq | FGC18937  | Y10558  | A | G | GRC15560109 |

|          |              |             |           |        |   |   |             |
|----------|--------------|-------------|-----------|--------|---|---|-------------|
| 23364760 | E2c-FGC29278 | FGC29278_eq | PF2466    |        | T | A | GRC15560109 |
| 23514921 | E2c-FGC29278 | FGC29278_eq | FGC18915  | Y10559 | A | G | GRC15560109 |
| 23540632 | E2c-FGC29278 | FGC29278_eq | FGC18930  | Y10560 | A | T | GRC15560109 |
| 23607994 | E2c-FGC29278 | FGC29278_eq |           |        | T | G | GRC15560109 |
| 23768261 | E2c-FGC29278 | FGC29278_eq | FGC18923  | Y10561 | G | A | GRC15560109 |
| 23781353 | E2c-FGC29278 | FGC29278_eq | FGC18916  | Y11585 | C | A | GRC15560109 |
| 23846028 | E2c-FGC29278 | FGC29278_eq |           | Y10537 | C | T | GRC15560109 |
| 23967941 | E2c-FGC29278 | FGC29278_eq | PF2469    |        | T | C | GRC15560109 |
| 23968555 | E2c-FGC29278 | FGC29278_eq | PF2470    |        | C | T | GRC15560109 |
| 24392260 | E2c-FGC29278 | FGC29278_eq | FGC19015  |        | G | A | GRC15560109 |
| 24420690 | E2c-FGC29278 | FGC29278_eq | FGC18913^ | Y10538 | A | G | GRC15560109 |
| 24483836 | E2c-FGC29278 | FGC29278_eq | FGC18922  | Y10562 | C | T | GRC15560109 |
| 2723620  | E2c-M81      | M81_eq      | CTS87     |        | C | G | node123     |
| 6631579  | E2c-M81      | M81_eq      | M5055     |        | A | T | node123     |
| 7317593  | E2c-M81      | M81_eq      | CTS1294   | Y83889 | C | G | node123     |
| 7376480  | E2c-M81      | M81_eq      | M5068     |        | G | A | node123     |
| 7612987  | E2c-M81      | M81_eq      | M5075     |        | G | A | node123     |
| 7752540  | E2c-M81      | M81_eq      | M5080     |        | T | C | node123     |
| 7830010  | E2c-M81      | M81_eq      | M5081     |        | T | C | node123     |
| 8415334  | E2c-M81      | M81_eq      | M5093     |        | G | A | node123     |
| 8422356  | E2c-M81      | M81_eq      |           |        | G | A | node123     |
| 8517662  | E2c-M81      | M81_eq      | M5097     |        | C | T | node123     |
| 8518796  | E2c-M81      | M81_eq      | M5098     |        | A | C | node123     |
| 8540752  | E2c-M81      | M81_eq      | M5099     |        | G | A | node123     |
| 8658928  | E2c-M81      | M81_eq      | M5023     |        | C | T | node123     |
| 8709331  | E2c-M81      | M81_eq      | M5103     |        | C | T | node123     |
| 8726283  | E2c-M81      | M81_eq      | M5104     |        | A | G | node123     |
| 8846573  | E2c-M81      | M81_eq      | M5024     |        | C | G | node123     |
| 8881572  | E2c-M81      | M81_eq      | M5008     |        | G | A | node123     |
| 8899540  | E2c-M81      | M81_eq      |           |        | C | T | node123     |
| 8900662  | E2c-M81      | M81_eq      | M5110     |        | T | C | node123     |
| 9135484  | E2c-M81      | M81_eq      | M5114     |        | T | C | node123     |
| 9392061  | E2c-M81      | M81_eq      | FGC22808  | Y7121  | C | A | node123     |
| 14082877 | E2c-M81      | M81_eq      | CTS1819   |        | C | T | node123     |
| 14222737 | E2c-M81      | M81_eq      | M5128     |        | C | T | node123     |
| 14365288 | E2c-M81      | M81_eq      | CTS2559   |        | C | A | node123     |
| 14375437 | E2c-M81      | M81_eq      | CTS2587   |        | G | C | node123     |
| 14858228 | E2c-M81      | M81_eq      | CTS3350   |        | T | A | node123     |
| 14888783 | E2c-M81      | M81_eq      | M183      |        | A | C | node123     |
| 14906675 | E2c-M81      | M81_eq      | CTS3415   |        | G | C | node123     |
| 14931308 | E2c-M81      | M81_eq      | CTS3442   |        | T | G | node123     |
| 15051814 | E2c-M81      | M81_eq      | CTS3594   |        | T | G | node123     |
| 15114328 | E2c-M81      | M81_eq      | CTS3700   |        | C | G | node123     |
| 15236994 | E2c-M81      | M81_eq      | CTS3870   |        | A | G | node123     |
| 15502732 | E2c-M81      | M81_eq      | CTS4236   |        | G | A | node123     |
| 15811495 | E2c-M81      | M81_eq      | M5172     |        | T | G | node123     |
| 15978952 | E2c-M81      | M81_eq      | CTS5039   |        | C | T | node123     |
| 16079185 | E2c-M81      | M81_eq      | CTS5229   |        | T | C | node123     |
| 16367635 | E2c-M81      | M81_eq      | CTS5567   |        | C | T | node123     |
| 16533152 | E2c-M81      | M81_eq      | PF2521^   |        | T | A | node123     |

|          |           |          |          |        |   |             |             |
|----------|-----------|----------|----------|--------|---|-------------|-------------|
| 16534130 | E2c-M81   | M81_eq   | CTS5883  | A      | G | node123     |             |
| 16586893 | E2c-M81   | M81_eq   | CTS5974  | T      | C | node123     |             |
| 16772143 | E2c-M81   | M81_eq   |          | G      | T | node123     |             |
| 16962383 | E2c-M81   | M81_eq   |          | T      | C | node123     |             |
| 17210201 | E2c-M81   | M81_eq   | CTS6955  | C      | T | node123     |             |
| 17308332 | E2c-M81   | M81_eq   | CTS7132  | T      | C | node123     |             |
| 17841654 | E2c-M81   | M81_eq   | CTS8121  | G      | T | node123     |             |
| 18068338 | E2c-M81   | M81_eq   | CTS8527  | C      | T | node123     |             |
| 18243339 | E2c-M81   | M81_eq   | CTS8854  | T      | A | node123     |             |
| 19323263 | E2c-M81   | M81_eq   | CTS10196 | C      | T | node123     |             |
| 19396045 | E2c-M81   | M81_eq   | CTS10321 | C      | T | node123     |             |
| 19482455 | E2c-M81   | M81_eq   | M5281    | A      | G | node123     |             |
| 21131447 | E2c-M81   | M81_eq   | M5286    | G      | C | node123     |             |
| 21437042 | E2c-M81   | M81_eq   | M5300    | G      | T | node123     |             |
| 21566639 | E2c-M81   | M81_eq   | M5303    | C      | T | node123     |             |
| 21785013 | E2c-M81   | M81_eq   | M5306    | A      | T | node123     |             |
| 21785697 | E2c-M81   | M81_eq   | M5307    | T      | C | node123     |             |
| 21892572 | E2c-M81   | M81      | M81      | C      | T | node123     |             |
| 22076595 | E2c-M81   | M81_eq   | M5320    | G      | T | node123     |             |
| 22280867 | E2c-M81   | M81_eq   |          | G      | T | node123     |             |
| 22477249 | E2c-M81   | M81_eq   |          | G      | T | node123     |             |
| 22566659 | E2c-M81   | M81_eq   | M5324    | G      | T | node123     |             |
| 22978109 | E2c-M81   | M81_eq   | CTS11147 | G      | A | node123     |             |
| 23074213 | E2c-M81   | M81_eq   | CTS11332 | C      | T | node123     |             |
| 23074218 | E2c-M81   | M81_eq   | CTS11333 | G      | A | node123     |             |
| 23124284 | E2c-M81   | M81_eq   | CTS11467 | G      | T | node123     |             |
| 23583756 | E2c-M81   | M81_eq   | M5358    | G      | A | node123     |             |
| 2749703  | E2c-B918  | B918     |          | T      | G | GRC15560168 |             |
| 8433723  | E2c-B918  | B918_eq  |          | G      | A | GRC15560168 |             |
| 8679581  | E2c-B918  | B918_eq  |          | C      | T | GRC15560168 |             |
| 8777661  | E2c-B918  | B918_eq  |          | T      | C | GRC15560168 |             |
| 8797520  | E2c-B918  | B918_eq  |          | G      | A | GRC15560168 |             |
| 8872426  | E2c-B918  | B918_eq  |          | A      | G | GRC15560168 |             |
| 8872436  | E2c-B918  | B918_eq  | Z32507   | A      | G | GRC15560168 |             |
| 9125176  | E2c-B918  | B918_eq  | A5604    | G      | T | GRC15560168 |             |
| 14069606 | E2c-B918  | B918_eq  |          | C      | T | GRC15560168 |             |
| 14234456 | E2c-B918  | B918_eq  | Y32602   | Y32602 | G | A           | GRC15560168 |
| 16766184 | E2c-B918  | B918_eq  | MZ64     | T      | G | GRC15560168 |             |
| 16844918 | E2c-B918  | B918_eq  |          | G      | A | GRC15560168 |             |
| 16910833 | E2c-B918  | B918_eq  |          | T      | G | GRC15560168 |             |
| 18076715 | E2c-B918  | B918_eq  |          | A      | T | GRC15560168 |             |
| 19080864 | E2c-B918  | B918_eq  |          | C      | G | GRC15560168 |             |
| 22527357 | E2c-B918  | B918_eq  | Z38186   | C      | A | GRC15560168 |             |
| 23535412 | E2c-B918  | B918_eq  |          | A      | C | GRC15560168 |             |
| 23558091 | E2c-B918  | B918_eq  |          | A      | C | GRC15560168 |             |
| 23599812 | E2c-B918  | B918_eq  |          | T      | C | GRC15560168 |             |
| 23809592 | E2c-B918  | B918_eq  |          | C      | T | GRC15560168 |             |
| 16716119 | E2c-M5284 | M5284_eq | CTS6185  | C      | A | node124     |             |
| 21064067 | E2c-M5284 | M5284    | M5284    | T      | A | node124     |             |
| 8425981  | E2c-B920  | B920     | PF6799   | G      | A | GRC15560142 |             |

|          |          |              |          |        |   |   |             |
|----------|----------|--------------|----------|--------|---|---|-------------|
| 8659092  | E2c-B920 | B920_eq      |          |        | A | C | GRC15560142 |
| 9380729  | E2c-B920 | B920_eq      |          |        | G | A | GRC15560142 |
| 16857347 | E2c-B920 | B920_eq      |          |        | G | A | GRC15560142 |
| 17345606 | E2c-B920 | B920_eq      | PF6794   |        | A | G | GRC15560142 |
| 17663821 | E2c-B920 | B920_eq      |          |        | G | A | GRC15560142 |
| 18556053 | E2c-B920 | B920_eq      |          |        | C | G | GRC15560142 |
| 18685251 | E2c-B920 | B920_eq      |          |        | G | A | GRC15560142 |
| 21772850 | E2c-B920 | B920_eq      | MZ1      | Y12245 | C | T | GRC15560142 |
| 22859629 | E2c-B920 | B920_eq      |          |        | C | T | GRC15560142 |
| 23125341 | E2c-B920 | B920_eq      | PF6789   |        | C | T | GRC15560142 |
| 6732918  | E2c-B919 | B919         |          |        | C | T | GRC15560144 |
| 6857628  | E2c-B919 | B9190_eq     |          |        | C | A | GRC15560144 |
| 8247895  | E2c-B919 | B9190_eq     |          |        | C | T | GRC15560144 |
| 15661762 | E2c-B919 | B9190_eq     | Z6341    |        | C | T | GRC15560144 |
| 16277530 | E2c-B919 | B9190_eq     |          |        | G | A | GRC15560144 |
| 16695746 | E2c-B919 | B9190_eq     | Y8829    | Y8829  | G | A | GRC15560144 |
| 18021817 | E2c-B919 | B9190_eq     |          |        | G | A | GRC15560144 |
| 18068713 | E2c-B919 | B9190_eq     |          |        | T | C | GRC15560144 |
| 18170107 | E2c-B919 | B9190_eq     |          |        | C | A | GRC15560144 |
| 23799307 | E2c-B919 | B9190_eq     |          |        | C | A | GRC15560144 |
| 6953603  | E2b      | CTS8288_eq   | CTS689   |        | C | T | node81      |
| 7729622  | E2b      | CTS8288_eq   | PF1961   |        | G | A | node81      |
| 8659100  | E2b      | CTS8288_eq   | M2427    |        | G | A | node81      |
| 9795609  | E2b      | CTS8288_eq   | PF1965   |        | A | C | node81      |
| 14523391 | E2b      | CTS8288_eq   |          |        | G | A | node81      |
| 14941989 | E2b      | CTS8288_eq   | CTS3457  |        | G | A | node81      |
| 16313785 | E2b      | CTS8288_eq   | CTS5487  |        | C | T | node81      |
| 16566193 | E2b      | CTS8288_eq   |          |        | A | C | node81      |
| 16948834 | E2b      | CTS8288_eq   | CTS6504  |        | G | A | node81      |
| 17077753 | E2b      | CTS8288_eq   | CTS6729  |        | C | G | node81      |
| 17223070 | E2b      | CTS8288_eq   |          |        | G | A | node81      |
| 17749464 | E2b      | CTS8288_eq   |          |        | C | T | node81      |
| 17767976 | E2b      | CTS8288_eq   |          |        | T | A | node81      |
| 17865060 | E2b      | CTS8288_eq   | CTS8182  |        | C | T | node81      |
| 17919115 | E2b      | CTS8288      |          |        | G | A | node81      |
| 18065432 | E2b      | CTS8288_eq   |          |        | A | C | node81      |
| 18203565 | E2b      | CTS8288_eq   | CTS8790  |        | T | C | node81      |
| 18719198 | E2b      | CTS8288_eq   | Y19289   |        | G | A | node81      |
| 19260655 | E2b      | CTS8288_eq   |          |        | T | C | node81      |
| 19379842 | E2b      | CTS8288_eq   | CTS10298 |        | T | C | node81      |
| 21797330 | E2b      | CTS8288_eq   | PF1997   |        | C | T | node81      |
| 22272070 | E2b      | CTS8288_eq   |          |        | G | A | node81      |
| 22460740 | E2b      | CTS8288_eq   |          |        | T | G | node81      |
| 23190691 | E2b      | CTS8288_eq   |          |        | G | A | node81      |
| 23268660 | E2b      | CTS8288_eq   | CTS11781 |        | G | C | node81      |
| 23268923 | E2b      | CTS8288_eq   |          |        | T | C | node81      |
| 23475853 | E2b      | CTS8288_eq   | PF2009   |        | T | G | node81      |
| 7828663  | E2b1'2   | PF1962(M123_ | PF1962   |        | A | C | node82      |
| 2774433  | E2b2     | Y20220       | Y20220   |        | G | A | node83      |
| 2810968  | E2b2     | Y20220_eq    | PF2025   |        | A | G | node83      |



|          |      |           |        |        |   |   |        |
|----------|------|-----------|--------|--------|---|---|--------|
| 7418920  | E2b2 | Y20220_eq | Y20221 |        | C | T | node83 |
| 7736041  | E2b2 | Y20220_eq | PF6775 |        | A | G | node83 |
| 8194642  | E2b2 | Y20220_eq | PF2032 |        | T | C | node83 |
| 8229002  | E2b2 | Y20220_eq | PF2033 |        | A | G | node83 |
| 8486108  | E2b2 | Y20220_eq | Y21036 | Y21036 | C | T | node83 |
| 8684748  | E2b2 | Y20220_eq | PF2034 |        | G | C | node83 |
| 8820769  | E2b2 | Y20220_eq | PF2035 |        | A | G | node83 |
| 9376274  | E2b2 | Y20220_eq |        |        | T | C | node83 |
| 9418110  | E2b2 | Y20220_eq | PF2036 |        | C | G | node83 |
| 9906211  | E2b2 | Y20220_eq | Y21034 | Y21034 | C | A | node83 |
| 14139071 | E2b2 | Y20220_eq | Y21022 | Y21022 | A | G | node83 |
| 14209510 | E2b2 | Y20220_eq | PF2044 |        | G | A | node83 |
| 14296205 | E2b2 | Y20220_eq | PF2045 |        | T | C | node83 |
| 14419252 | E2b2 | Y20220_eq | PF2048 | Y49521 | T | C | node83 |
| 14661971 | E2b2 | Y20220_eq |        |        | C | T | node83 |
| 15736492 | E2b2 | Y20220_eq | PF2054 |        | T | C | node83 |
| 15772590 | E2b2 | Y20220_eq | PF2055 |        | G | T | node83 |
| 15932523 | E2b2 | Y20220_eq | Y21038 | Y21038 | A | G | node83 |
| 15954647 | E2b2 | Y20220_eq | PF1977 |        | T | C | node83 |
| 16086734 | E2b2 | Y20220_eq | Y20222 |        | A | G | node83 |
| 16188682 | E2b2 | Y20220_eq | Y20229 | Y20229 | A | T | node83 |
| 16260821 | E2b2 | Y20220_eq | PF2056 |        | T | C | node83 |
| 16530226 | E2b2 | Y20220_eq | PF2058 |        | T | C | node83 |
| 16549811 | E2b2 | Y20220_eq | Y21027 | Y21027 | A | T | node83 |
| 16667766 | E2b2 | Y20220_eq | Z21473 |        | C | T | node83 |
| 16733169 | E2b2 | Y20220_eq | Y20225 |        | A | C | node83 |
| 16966780 | E2b2 | Y20220_eq | Y20226 |        | G | A | node83 |
| 16969680 | E2b2 | Y20220_eq | Y20223 |        | G | C | node83 |
| 17056345 | E2b2 | Y20220_eq | Y21023 | Y21023 | T | C | node83 |
| 17167342 | E2b2 | Y20220_eq | PF6767 |        | C | A | node83 |
| 17195862 | E2b2 | Y20220_eq | Y20227 |        | G | T | node83 |
| 17435705 | E2b2 | Y20220_eq | PF2063 |        | G | A | node83 |
| 17560956 | E2b2 | Y20220_eq | Z21472 |        | A | C | node83 |
| 17851098 | E2b2 | Y20220_eq | Y20224 |        | G | A | node83 |
| 18069775 | E2b2 | Y20220_eq | PF2066 |        | T | C | node83 |
| 18126522 | E2b2 | Y20220_eq | M7866  |        | T | A | node83 |
| 18414945 | E2b2 | Y20220_eq | PF2069 |        | G | T | node83 |
| 18778392 | E2b2 | Y20220_eq | Y21024 | Y21024 | A | T | node83 |
| 19068175 | E2b2 | Y20220_eq | Z21474 |        | G | A | node83 |
| 19349586 | E2b2 | Y20220_eq | PF6765 |        | G | A | node83 |
| 21117309 | E2b2 | Y20220_eq | Y21029 | Y21029 | G | T | node83 |
| 21178949 | E2b2 | Y20220_eq | PF2076 |        | T | C | node83 |
| 21188969 | E2b2 | Y20220_eq | Y21025 | Y21025 | A | C | node83 |
| 21811407 | E2b2 | Y20220_eq | PF6772 |        | C | T | node83 |
| 22165642 | E2b2 | Y20220_eq | Y20228 |        | A | T | node83 |
| 22176597 | E2b2 | Y20220_eq | PF2081 |        | A | C | node83 |
| 22565799 | E2b2 | Y20220_eq | PF2084 |        | C | A | node83 |
| 22806626 | E2b2 | Y20220_eq | Y21026 | Y21026 | G | C | node83 |
| 23130241 | E2b2 | Y20220_eq | PF2085 |        | G | A | node83 |
| 23271235 | E2b2 | Y20220_eq | Y21031 | Y21031 | C | A | node83 |

|          |             |           |          |        |   |   |        |
|----------|-------------|-----------|----------|--------|---|---|--------|
| 23392787 | E2b2        | Y20220_eq | Y21032   | Y21032 | T | A | node83 |
| 24363487 | E2b2        | Y20220_eq | Y21033   | Y21033 | A | G | node83 |
| 2723746  | E2b2-PF2024 | PF2024    | PF2024   |        | A | G | node84 |
| 6643355  | E2b2-PF2024 | PF2024_eq | PF2026   |        | T | A | node84 |
| 6893193  | E2b2-PF2024 | PF2024_eq | PF2027   |        | T | A | node84 |
| 6963904  | E2b2-PF2024 | PF2024_eq | YP5412   | YP5412 | T | A | node84 |
| 7197996  | E2b2-PF2024 | PF2024_eq | Y21116   | Y21116 | T | C | node84 |
| 7634867  | E2b2-PF2024 | PF2024_eq | PF2028   |        | G | A | node84 |
| 8060181  | E2b2-PF2024 | PF2024_eq | PF2031   |        | C | T | node84 |
| 8820639  | E2b2-PF2024 | PF2024_eq | Y22941   | Y22941 | C | T | node84 |
| 9867302  | E2b2-PF2024 | PF2024_eq |          |        | T | C | node84 |
| 14048328 | E2b2-PF2024 | PF2024_eq |          |        | T | A | node84 |
| 14117639 | E2b2-PF2024 | PF2024_eq | PF2042   |        | A | G | node84 |
| 14333998 | E2b2-PF2024 | PF2024_eq | PF2046   |        | A | G | node84 |
| 14662070 | E2b2-PF2024 | PF2024_eq | Z21471   |        | A | G | node84 |
| 15094816 | E2b2-PF2024 | PF2024_eq | PF2051   |        | G | T | node84 |
| 15180558 | E2b2-PF2024 | PF2024_eq | Y21126   | Y21126 | G | T | node84 |
| 15338583 | E2b2-PF2024 | PF2024_eq | PF1974   |        | C | T | node84 |
| 15384497 | E2b2-PF2024 | PF2024_eq | FGC26459 | YP2975 | G | A | node84 |
| 15554094 | E2b2-PF2024 | PF2024_eq | PF2053   |        | T | C | node84 |
| 15781991 | E2b2-PF2024 | PF2024_eq |          |        | C | T | node84 |
| 16085748 | E2b2-PF2024 | PF2024_eq | PF1978   |        | C | T | node84 |
| 16343521 | E2b2-PF2024 | PF2024_eq | PF1980   |        | A | G | node84 |
| 16575666 | E2b2-PF2024 | PF2024_eq | PF6768   |        | G | A | node84 |
| 16637203 | E2b2-PF2024 | PF2024_eq |          |        | T | C | node84 |
| 16754945 | E2b2-PF2024 | PF2024_eq | PF2060   |        | C | T | node84 |
| 16948519 | E2b2-PF2024 | PF2024_eq | Y21120   | Y21120 | T | G | node84 |
| 17191409 | E2b2-PF2024 | PF2024_eq | Y23106   | Y23106 | A | G | node84 |
| 17518009 | E2b2-PF2024 | PF2024_eq | PF2064   |        | A | T | node84 |
| 17675730 | E2b2-PF2024 | PF2024_eq | Y21121   | Y21121 | G | A | node84 |
| 17908419 | E2b2-PF2024 | PF2024_eq | Y21122   | Y21122 | G | A | node84 |
| 17914171 | E2b2-PF2024 | PF2024_eq | Y22939   | Y22939 | C | T | node84 |
| 17979755 | E2b2-PF2024 | PF2024_eq | PF1987   | Y72784 | G | C | node84 |
| 18256786 | E2b2-PF2024 | PF2024_eq | PF2068   |        | G | C | node84 |
| 18609272 | E2b2-PF2024 | PF2024_eq | PF2070   |        | C | T | node84 |
| 18833628 | E2b2-PF2024 | PF2024_eq | PF6766   |        | A | G | node84 |
| 19193611 | E2b2-PF2024 | PF2024_eq | PF2072   |        | G | C | node84 |
| 19342007 | E2b2-PF2024 | PF2024_eq | Y21028   | Y21028 | C | T | node84 |
| 19349520 | E2b2-PF2024 | PF2024_eq | PF2073   |        | A | G | node84 |
| 19400868 | E2b2-PF2024 | PF2024_eq | PF2074   |        | A | T | node84 |
| 21611175 | E2b2-PF2024 | PF2024_eq | PF2079   |        | T | A | node84 |
| 21691570 | E2b2-PF2024 | PF2024_eq |          |        | A | T | node84 |
| 22199833 | E2b2-PF2024 | PF2024_eq | PF2082   |        | A | G | node84 |
| 22467562 | E2b2-PF2024 | PF2024_eq |          |        | G | T | node84 |
| 22612722 | E2b2-PF2024 | PF2024_eq | Y22935   | Y22935 | A | G | node84 |
| 22669333 | E2b2-PF2024 | PF2024_eq | Y21937   | Y21937 | T | C | node84 |
| 22709726 | E2b2-PF2024 | PF2024_eq | Y21125   | Y21125 | C | T | node84 |
| 23387361 | E2b2-PF2024 | PF2024_eq | PF6764   |        | T | G | node84 |
| 23541722 | E2b2-PF2024 | PF2024_eq | Y22937   | Y22937 | T | C | node84 |
| 23800823 | E2b2-PF2024 | PF2024_eq |          |        | G | C | node84 |

|          |             |           |        |        |   |   |        |
|----------|-------------|-----------|--------|--------|---|---|--------|
| 23964007 | E2b2-PF2024 | PF2024_eq | Y22936 | Y22936 | G | A | node84 |
| 23992481 | E2b2-PF2024 | PF2024_eq | PF2087 |        | G | A | node84 |
| 24485070 | E2b2-PF2024 | PF2024_eq | Y22938 | Y22938 | G | A | node84 |
| 24507713 | E2b2-PF2024 | PF2024_eq |        |        | A | G | node84 |
| 2742557  | E2b2-Y36791 | Y36791    |        | Y36791 | A | G | node86 |
| 6700093  | E2b2-Y36791 | Y36791_eq |        | Y36793 | G | A | node86 |
| 7349830  | E2b2-Y36791 | Y36791_eq |        | Y35935 | G | A | node86 |
| 7529156  | E2b2-Y36791 | Y36791_eq |        | Y36795 | G | A | node86 |
| 7597627  | E2b2-Y36791 | Y36791_eq |        | Y36796 | G | A | node86 |
| 8327400  | E2b2-Y36791 | Y36791_eq |        | Y35936 | C | T | node86 |
| 8397324  | E2b2-Y36791 | Y36791_eq |        | Y36797 | C | T | node86 |
| 8452792  | E2b2-Y36791 | Y36791_eq |        | Y36798 | A | G | node86 |
| 8659429  | E2b2-Y36791 | Y36791_eq |        | Y36799 | G | A | node86 |
| 8705404  | E2b2-Y36791 | Y36791_eq | Z35323 | Y36800 | A | T | node86 |
| 9426485  | E2b2-Y36791 | Y36791_eq |        | Y36804 | G | T | node86 |
| 9835814  | E2b2-Y36791 | Y36791_eq |        | Y36805 | G | A | node86 |
| 14094258 | E2b2-Y36791 | Y36791_eq |        | Y35937 | C | G | node86 |
| 14200167 | E2b2-Y36791 | Y36791_eq |        | Y36806 | C | G | node86 |
| 14418646 | E2b2-Y36791 | Y36791_eq |        | Y36807 | G | C | node86 |
| 14551328 | E2b2-Y36791 | Y36791_eq |        | Y36808 | C | T | node86 |
| 14996272 | E2b2-Y36791 | Y36791_eq |        | Y35940 | C | T | node86 |
| 15438622 | E2b2-Y36791 | Y36791_eq |        | Y35941 | C | G | node86 |
| 15819896 | E2b2-Y36791 | Y36791_eq |        | Y35942 | C | G | node86 |
| 16345709 | E2b2-Y36791 | Y36791_eq |        | Y35943 | T | C | node86 |
| 16441973 | E2b2-Y36791 | Y36791_eq |        | Y69906 | A | C | node86 |
| 16635201 | E2b2-Y36791 | Y36791_eq |        | Y36809 | C | T | node86 |
| 16744706 | E2b2-Y36791 | Y36791_eq |        | Y36810 | C | A | node86 |
| 17166353 | E2b2-Y36791 | Y36791_eq |        | Y35945 | C | G | node86 |
| 17177623 | E2b2-Y36791 | Y36791_eq |        | Y35946 | G | A | node86 |
| 17390155 | E2b2-Y36791 | Y36791_eq |        | Y35947 | A | C | node86 |
| 17496019 | E2b2-Y36791 | Y36791_eq |        | Y36813 | T | A | node86 |
| 17496125 | E2b2-Y36791 | Y36791_eq |        | Y35948 | G | C | node86 |
| 17753404 | E2b2-Y36791 | Y36791_eq |        | Y36814 | T | C | node86 |
| 18069210 | E2b2-Y36791 | Y36791_eq |        | Y35949 | A | T | node86 |
| 18865260 | E2b2-Y36791 | Y36791_eq |        | Y36816 | G | A | node86 |
| 18941331 | E2b2-Y36791 | Y36791_eq |        | Y36818 | A | G | node86 |
| 18983599 | E2b2-Y36791 | Y36791_eq |        | Y36819 | T | A | node86 |
| 18993790 | E2b2-Y36791 | Y36791_eq |        | Y36820 | T | C | node86 |
| 19039041 | E2b2-Y36791 | Y36791_eq |        | Y36821 | T | A | node86 |
| 19224128 | E2b2-Y36791 | Y36791_eq |        | Y36822 | C | T | node86 |
| 19551337 | E2b2-Y36791 | Y36791_eq |        | Y36823 | T | C | node86 |
| 21874050 | E2b2-Y36791 | Y36791_eq |        | Y36824 | C | G | node86 |
| 22109676 | E2b2-Y36791 | Y36791_eq |        | Y36825 | G | A | node86 |
| 22278000 | E2b2-Y36791 | Y36791_eq |        |        | A | G | node86 |
| 22596727 | E2b2-Y36791 | Y36791_eq |        | Y35950 | C | T | node86 |
| 23207770 | E2b2-Y36791 | Y36791_eq |        | Y36826 | A | G | node86 |
| 23261765 | E2b2-Y36791 | Y36791_eq |        | Y36827 | C | G | node86 |
| 23436553 | E2b2-Y36791 | Y36791_eq |        | Y36828 | T | C | node86 |
| 23637265 | E2b2-Y36791 | Y36791_eq |        | Y35951 | G | A | node86 |
| 24440117 | E2b2-Y36791 | Y36791_eq |        | Y36829 | G | A | node86 |

|          |             |           |         |  |   |   |         |
|----------|-------------|-----------|---------|--|---|---|---------|
| 6945703  | E2b1        | M123_eq   | CTS677  |  | G | A | node91  |
| 8700450  | E2b1        | M123_eq   | L857    |  | T | G | node91  |
| 14006096 | E2b1        | M123_eq   | CTS1652 |  | G | T | node91  |
| 15154024 | E2b1        | M123_eq   |         |  | T | A | node91  |
| 16874320 | E2b1        | M123_eq   | CTS6404 |  | A | G | node91  |
| 18976881 | E2b1        | M123_eq   | CTS9588 |  | A | G | node91  |
| 21688177 | E2b1        | M123_eq   | PF2021  |  | A | G | node91  |
| 21764586 | E2b1        | M123      | M123    |  | C | T | node91  |
| 21782311 | E2b1        | M123_eq   |         |  | C | T | node91  |
| 7244494  | E2b1-Y84586 | Y84586_eq |         |  | C | A | node120 |
| 7657928  | E2b1-Y84586 | Y84586    | Y84586  |  | A | G | node120 |
| 7900128  | E2b1-Y84586 | Y84586_eq |         |  | G | T | node120 |
| 7960444  | E2b1-Y84586 | Y84586_eq |         |  | C | A | node120 |
| 8113392  | E2b1-Y84586 | Y84586_eq |         |  | C | T | node120 |
| 8465515  | E2b1-Y84586 | Y84586_eq |         |  | C | A | node120 |
| 8760015  | E2b1-Y84586 | Y84586_eq | Y87923  |  | G | A | node120 |
| 9418388  | E2b1-Y84586 | Y84586_eq |         |  | A | C | node120 |
| 14292884 | E2b1-Y84586 | Y84586_eq |         |  | G | A | node120 |
| 14337019 | E2b1-Y84586 | Y84586_eq |         |  | C | T | node120 |
| 14967826 | E2b1-Y84586 | Y84586_eq |         |  | C | G | node120 |
| 15113408 | E2b1-Y84586 | Y84586_eq | Y93055  |  | T | A | node120 |
| 15152796 | E2b1-Y84586 | Y84586_eq |         |  | A | T | node120 |
| 15346630 | E2b1-Y84586 | Y84586_eq |         |  | G | C | node120 |
| 15776478 | E2b1-Y84586 | Y84586_eq | Y94753  |  | C | T | node120 |
| 16402270 | E2b1-Y84586 | Y84586_eq | Y96227  |  | G | T | node120 |
| 16434475 | E2b1-Y84586 | Y84586_eq |         |  | C | T | node120 |
| 16763058 | E2b1-Y84586 | Y84586_eq |         |  | T | C | node120 |
| 16970507 | E2b1-Y84586 | Y84586_eq |         |  | G | T | node120 |
| 17099162 | E2b1-Y84586 | Y84586_eq |         |  | A | T | node120 |
| 17272479 | E2b1-Y84586 | Y84586_eq | Y31993  |  | A | C | node120 |
| 17557290 | E2b1-Y84586 | Y84586_eq | Y99525  |  | G | A | node120 |
| 17793078 | E2b1-Y84586 | Y84586_eq | Y31994  |  | T | A | node120 |
| 17793112 | E2b1-Y84586 | Y84586_eq | Y31999  |  | A | C | node120 |
| 17794514 | E2b1-Y84586 | Y84586_eq |         |  | T | C | node120 |
| 17799707 | E2b1-Y84586 | Y84586_eq |         |  | G | A | node120 |
| 17894447 | E2b1-Y84586 | Y84586_eq |         |  | G | A | node120 |
| 18091735 | E2b1-Y84586 | Y84586_eq |         |  | G | A | node120 |
| 18403464 | E2b1-Y84586 | Y84586_eq | Y30966  |  | C | A | node120 |
| 19040083 | E2b1-Y84586 | Y84586_eq | Y103443 |  | G | C | node120 |
| 19144069 | E2b1-Y84586 | Y84586_eq | Y103789 |  | T | C | node120 |
| 19258310 | E2b1-Y84586 | Y84586_eq |         |  | A | G | node120 |
| 21066317 | E2b1-Y84586 | Y84586_eq |         |  | C | T | node120 |
| 21141721 | E2b1-Y84586 | Y84586_eq |         |  | T | C | node120 |
| 21372572 | E2b1-Y84586 | Y84586_eq |         |  | C | T | node120 |
| 21434643 | E2b1-Y84586 | Y84586_eq | Y106466 |  | A | C | node120 |
| 21570811 | E2b1-Y84586 | Y84586_eq |         |  | C | T | node120 |
| 22272439 | E2b1-Y84586 | Y84586_eq |         |  | G | T | node120 |
| 22471046 | E2b1-Y84586 | Y84586_eq |         |  | G | A | node120 |
| 22904781 | E2b1-Y84586 | Y84586_eq |         |  | A | G | node120 |
| 23069325 | E2b1-Y84586 | Y84586_eq |         |  | T | C | node120 |

|          |             |           |         |   |   |                 |
|----------|-------------|-----------|---------|---|---|-----------------|
| 23140754 | E2b1-Y84586 | Y84586_eq |         | C | A | node120         |
| 23554306 | E2b1-Y84586 | Y84586_eq | Y31991  | G | A | node120         |
| 23793882 | E2b1-Y84586 | Y84586_eq |         | G | T | node120         |
| 23960182 | E2b1-Y84586 | Y84586_eq |         | A | G | node120         |
| 6630157  | E2b1-Y86751 | Y86751_eq |         | T | C | node121         |
| 8406245  | E2b1-Y86751 | Y86751    | Y86751  | G | T | node121         |
| 8407097  | E2b1-Y86751 | Y86751_eq |         | A | C | node121         |
| 8827558  | E2b1-Y86751 | Y86751_eq | Y88106  | T | C | node121         |
| 14002960 | E2b1-Y86751 | Y86751_eq |         | T | C | node121         |
| 14330331 | E2b1-Y86751 | Y86751_eq | Y91092  | T | C | node121         |
| 14853712 | E2b1-Y86751 | Y86751_eq | Y92352  | G | A | node121         |
| 15057763 | E2b1-Y86751 | Y86751_eq | Y92917  | A | T | node121         |
| 15134263 | E2b1-Y86751 | Y86751_eq | Y93107  | G | A | node121         |
| 15349061 | E2b1-Y86751 | Y86751_eq | Y93599  | T | C | node121         |
| 15387719 | E2b1-Y86751 | Y86751_eq | Y93677  | C | T | node121         |
| 15902374 | E2b1-Y86751 | Y86751_eq | Y95076  | C | T | node121         |
| 16367054 | E2b1-Y86751 | Y86751_eq | Y96109  | C | T | node121         |
| 16650216 | E2b1-Y86751 | Y86751_eq | Y96933  | G | C | node121         |
| 16762322 | E2b1-Y86751 | Y86751_eq | Y97216  | A | C | node121         |
| 16767893 | E2b1-Y86751 | Y86751_eq | Y97235  | G | A | node121         |
| 16794986 | E2b1-Y86751 | Y86751_eq | Y97321  | G | A | node121         |
| 16869881 | E2b1-Y86751 | Y86751_eq | Y97556  | T | G | node121         |
| 17008272 | E2b1-Y86751 | Y86751_eq | Y97929  | C | T | node121         |
| 17356558 | E2b1-Y86751 | Y86751_eq | Y98906  | A | T | node121         |
| 17424684 | E2b1-Y86751 | Y86751_eq | Y99118  | T | G | node121         |
| 18675859 | E2b1-Y86751 | Y86751_eq | Y102401 | C | T | node121         |
| 18838011 | E2b1-Y86751 | Y86751_eq | Y102823 | A | G | node121         |
| 19290151 | E2b1-Y86751 | Y86751_eq | Y104290 | A | G | node121         |
| 19322170 | E2b1-Y86751 | Y86751_eq | Y104405 | T | C | node121         |
| 21201003 | E2b1-Y86751 | Y86751_eq | Y105689 | C | G | node121         |
| 21300980 | E2b1-Y86751 | Y86751_eq | Y106027 | G | A | node121         |
| 21481222 | E2b1-Y86751 | Y86751_eq | Y106618 | A | G | node121         |
| 21692575 | E2b1-Y86751 | Y86751_eq | Y107230 | C | G | node121         |
| 21756320 | E2b1-Y86751 | Y86751_eq | Y107412 | G | A | node121         |
| 22018433 | E2b1-Y86751 | Y86751_eq | Y108148 | T | C | node121         |
| 22156782 | E2b1-Y86751 | Y86751_eq | Y108527 | G | T | node121         |
| 23329442 | E2b1-Y86751 | Y86751_eq | Y111294 | C | T | node121         |
| 23804739 | E2b1-Y86751 | Y86751_eq | Y112359 | T | C | node121         |
| 7591715  | E2b1-Y78188 | Y78188_eq |         | A | G | GS000016217-ASM |
| 7914226  | E2b1-Y78188 | Y78188_eq |         | C | T | GS000016217-ASM |
| 9166223  | E2b1-Y78188 | Y78188_eq |         | G | A | GS000016217-ASM |
| 14076273 | E2b1-Y78188 | Y78188_eq |         | C | T | GS000016217-ASM |
| 16195907 | E2b1-Y78188 | Y78188_eq |         | A | G | GS000016217-ASM |
| 16409551 | E2b1-Y78188 | Y78188_eq |         | A | C | GS000016217-ASM |
| 17948896 | E2b1-Y78188 | Y78188_eq |         | G | T | GS000016217-ASM |
| 18839348 | E2b1-Y78188 | Y78188_eq |         | A | C | GS000016217-ASM |
| 21334468 | E2b1-Y78188 | Y78188_eq |         | G | T | GS000016217-ASM |
| 21862684 | E2b1-Y78188 | Y78188_eq |         | A | C | GS000016217-ASM |
| 22549642 | E2b1-Y78188 | Y78188    | Y78188  | T | C | GS000016217-ASM |
| 23246508 | E2b1-Y78188 | Y78188_eq |         | C | T | GS000016217-ASM |

|          |             |           |          |        |   |   |                 |
|----------|-------------|-----------|----------|--------|---|---|-----------------|
| 23472814 | E2b1-Y78188 | Y78188_eq |          |        | A | G | GS000016217-ASM |
| 7283442  | E2b1-M43    | M34_eq    | CTS1229  |        | C | T | node92          |
| 7533955  | E2b1-M43    | M34_eq    |          |        | A | G | node92          |
| 8051123  | E2b1-M43    | M34_eq    | L797     |        | T | C | node92          |
| 8240479  | E2b1-M43    | M34_eq    | L787     |        | T | C | node92          |
| 8704571  | E2b1-M43    | M34_eq    | PF2018   |        | C | T | node92          |
| 15737401 | E2b1-M43    | M34_eq    |          |        | G | A | node92          |
| 16508155 | E2b1-M43    | M34_eq    |          |        | T | A | node92          |
| 17851988 | E2b1-M43    | M34_eq    |          |        | T | G | node92          |
| 19202083 | E2b1-M43    | M34_eq    |          |        | C | G | node92          |
| 21451978 | E2b1-M43    | M34_eq    | PF2020   |        | C | T | node92          |
| 21740716 | E2b1-M43    | M34       | M34      |        | G | T | node92          |
| 22192088 | E2b1-M43    | M34_eq    |          |        | T | C | node92          |
| 22278334 | E2b1-M43    | M34_eq    |          |        | T | C | node92          |
| 22681905 | E2b1-M43    | M34_eq    | CTS10656 |        | C | T | node92          |
| 22890739 | E2b1-M43    | M34_eq    | CTS11004 |        | T | G | node92          |
| 23405883 | E2b1-M43    | M34_eq    |          |        | G | T | node92          |
| 6661728  | E2b1-Z841   | Z841      | Z841     |        | C | T | node108         |
| 7140018  | E2b1-Z841   | Z841_eq   |          | Y2933  | T | C | node108         |
| 7796158  | E2b1-Z841   | Z841_eq   | Y2934    | Y2934  | G | A | node108         |
| 14035741 | E2b1-Z841   | Z841_eq   |          |        | C | T | node108         |
| 14044827 | E2b1-Z841   | Z841_eq   | CTS1744  |        | C | T | node108         |
| 14116330 | E2b1-Z841   | Z841_eq   | CTS1901  |        | G | A | node108         |
| 14266783 | E2b1-Z841   | Z841_eq   |          |        | C | T | node108         |
| 14346654 | E2b1-Z841   | Z841_eq   | CTS2525  |        | G | T | node108         |
| 14370591 | E2b1-Z841   | Z841_eq   |          | Y2942  | T | C | node108         |
| 15011918 | E2b1-Z841   | Z841_eq   | CTS3559  |        | C | T | node108         |
| 16837626 | E2b1-Z841   | Z841_eq   |          | Y2943  | A | C | node108         |
| 17202886 | E2b1-Z841   | Z841_eq   | CTS6938  |        | G | C | node108         |
| 19159383 | E2b1-Z841   | Z841_eq   |          | Y4178  | G | A | node108         |
| 21494124 | E2b1-Z841   | Z841_eq   | Y15502   | Y15502 | T | A | node108         |
| 21865453 | E2b1-Z841   | Z841_eq   |          | Y2961  | G | A | node108         |
| 2871919  | E2b1-PF6746 | PF6746_eq | S8428    |        | G | T | node93          |
| 6635802  | E2b1-PF6746 | PF6746_eq | FGC18332 | Y5444  | T | G | node93          |
| 6931109  | E2b1-PF6746 | PF6746_eq |          |        | G | A | node93          |
| 7148062  | E2b1-PF6746 | PF6746_eq | FGC18324 | Y5417  | G | A | node93          |
| 7508107  | E2b1-PF6746 | PF6746_eq | FGC18329 | Y5426  | C | G | node93          |
| 7653959  | E2b1-PF6746 | PF6746_eq | S10460   |        | G | T | node93          |
| 7873104  | E2b1-PF6746 | PF6746_eq | FGC18319 | Y5413  | T | C | node93          |
| 7934084  | E2b1-PF6746 | PF6746_eq | S10862   |        | G | A | node93          |
| 7942896  | E2b1-PF6746 | PF6746_eq | S10871   |        | A | G | node93          |
| 7977606  | E2b1-PF6746 | PF6746_eq | S10914   |        | G | A | node93          |
| 8099782  | E2b1-PF6746 | PF6746_eq |          | Y46834 | G | T | node93          |
| 8240582  | E2b1-PF6746 | PF6746_eq | L788     |        | C | T | node93          |
| 8420937  | E2b1-PF6746 | PF6746_eq | S11435   |        | T | C | node93          |
| 8519391  | E2b1-PF6746 | PF6746_eq | PF6750   |        | C | T | node93          |
| 8706371  | E2b1-PF6746 | PF6746_eq |          |        | C | T | node93          |
| 8793366  | E2b1-PF6746 | PF6746_eq |          |        | C | G | node93          |
| 9819239  | E2b1-PF6746 | PF6746_eq | S12502   |        | A | G | node93          |
| 14819174 | E2b1-PF6746 | PF6746_eq |          | Y5428  | C | T | node93          |

|          |             |           |           |       |   |   |        |
|----------|-------------|-----------|-----------|-------|---|---|--------|
| 15350926 | E2b1-PF6746 | PF6746_eq | CTS4041   |       | G | T | node93 |
| 15360222 | E2b1-PF6746 | PF6746_eq | S17046    |       | A | G | node93 |
| 15374136 | E2b1-PF6746 | PF6746_eq | CTS4068   |       | G | A | node93 |
| 15642631 | E2b1-PF6746 | PF6746_eq | FGC18318^ | Y5429 | T | C | node93 |
| 15713060 | E2b1-PF6746 | PF6746_eq | FGC13413  | Y5415 | A | C | node93 |
| 15757262 | E2b1-PF6746 | PF6746_eq | CTS4659   |       | A | C | node93 |
| 16197881 | E2b1-PF6746 | PF6746_eq | CTS5306   |       | A | G | node93 |
| 17298143 | E2b1-PF6746 | PF6746_eq | CTS7118   |       | A | G | node93 |
| 17712721 | E2b1-PF6746 | PF6746_eq | S20101    |       | G | A | node93 |
| 17914192 | E2b1-PF6746 | PF6746_eq |           | Y5430 | T | C | node93 |
| 17915511 | E2b1-PF6746 | PF6746_eq | CTS8281   |       | T | C | node93 |
| 18251330 | E2b1-PF6746 | PF6746_eq | S20870    |       | T | C | node93 |
| 18586605 | E2b1-PF6746 | PF6746_eq | CTS8973   |       | G | A | node93 |
| 18891599 | E2b1-PF6746 | PF6746_eq | S21430    |       | G | C | node93 |
| 18963596 | E2b1-PF6746 | PF6746_eq | CTS9561   |       | G | A | node93 |
| 18985886 | E2b1-PF6746 | PF6746_eq | FGC18322  | Y5411 | A | T | node93 |
| 19164275 | E2b1-PF6746 | PF6746_eq | CTS9944   |       | G | A | node93 |
| 19511144 | E2b1-PF6746 | PF6746_eq | CTS10524  |       | C | T | node93 |
| 21542647 | E2b1-PF6746 | PF6746_eq | S23225    |       | A | G | node93 |
| 21548445 | E2b1-PF6746 | PF6746_eq | S23230    |       | G | A | node93 |
| 21814778 | E2b1-PF6746 | PF6746_eq | FGC18311  | Y5416 | A | G | node93 |
| 21984660 | E2b1-PF6746 | PF6746_eq | FGC18306  | Y5423 | C | A | node93 |
| 22119525 | E2b1-PF6746 | PF6746    | PF6746    |       | T | C | node93 |
| 22120866 | E2b1-PF6746 | PF6746_eq | S23992    |       | C | T | node93 |
| 22302935 | E2b1-PF6746 | PF6746_eq |           |       | A | T | node93 |
| 22514456 | E2b1-PF6746 | PF6746_eq | S24351    |       | A | G | node93 |
| 22711937 | E2b1-PF6746 | PF6746_eq | FGC18314  | Y5433 | C | T | node93 |
| 22998407 | E2b1-PF6746 | PF6746_eq | S24981    |       | A | G | node93 |
| 23557237 | E2b1-PF6746 | PF6746_eq | FGC18303  | Y5434 | A | G | node93 |
| 23775226 | E2b1-PF6746 | PF6746_eq | S25832    |       | C | T | node93 |
| 24440809 | E2b1-PF6746 | PF6746_eq | S26174    |       | G | A | node93 |
