# Supplementary material
Source: PubMed Central journal article supplement (PMC8484622)
Supplement: 41431_2021_897_MOESM13_ESM.pdf [file 41431_2021_897_MOESM13_ESM.pdf]

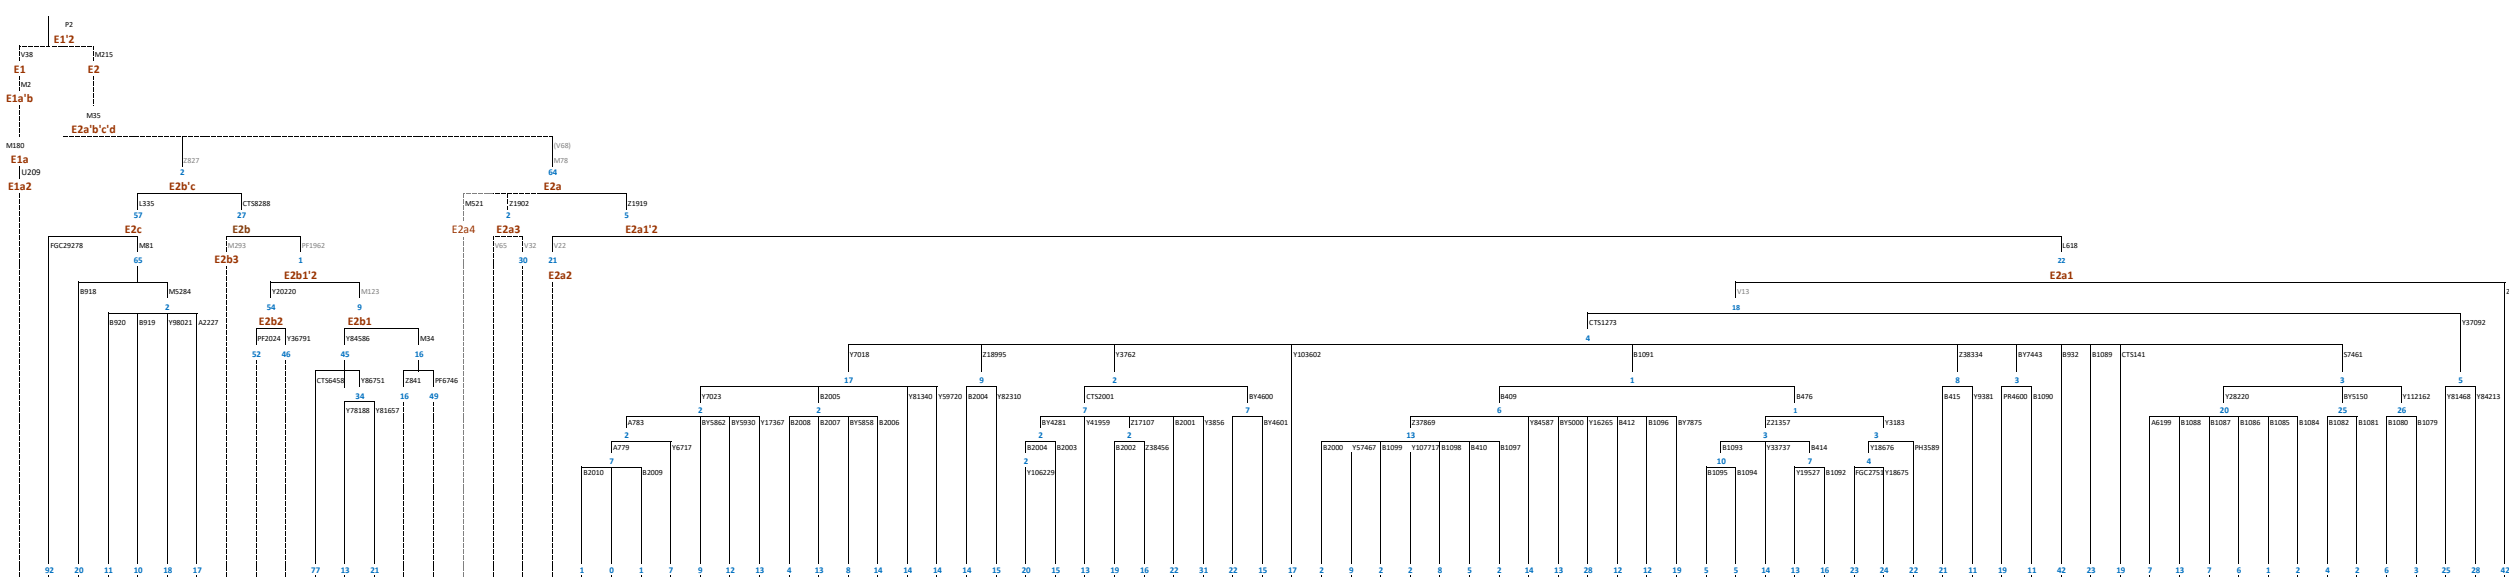

| Sample ID          | Geographic Origin                                                     |
|--------------------|-----------------------------------------------------------------------|
| GRC15560109        | 2 Youab                                                               |
| GRC15560168        | Jewish                                                                |
| GRC15560142        | Jewish                                                                |
| GRC15560144        | Jewish                                                                |
| Sample-197         | Sweden                                                                |
| V5706              | Estonia                                                               |
| GRC15560143        | Jewish                                                                |
|                    | 2 Jewish, Sweden                                                      |
|                    | 4 Jewish, Poland, Ukraine                                             |
| V26173             | Estonia                                                               |
| G500016217-ASM     | Christian-Arab-Israel                                                 |
| Sample-470         | Germany                                                               |
|                    | Near East, Arab, 8 Jewish, Poland, Latvia, Estonia                    |
|                    | 9 Jewish, 2 Near East, 2 Ukraine, Poland, Russian Federation, Estonia |
| Sample-1098        | Germany                                                               |
|                    | Iran, Peru, Russian Federation                                        |
|                    | 2 Near East, 4 Jewish, 2 Near East, Germany                           |
| Sample-1093        | Germany                                                               |
| G500015852         | Germany                                                               |
| Sample-1013        | Germany                                                               |
| Sample-856         | Germany                                                               |
| Sample-1777        | Sweden                                                                |
| Sample-1415        | Germany                                                               |
| Sample-1294        | Germany                                                               |
| W0937              | Estonia                                                               |
| W0117              | Estonia                                                               |
| Sample-862         | Russian Federation                                                    |
| V53837             | Estonia                                                               |
| Sample-1371        | Germany                                                               |
| Sample-89          | Poland                                                                |
| Sample-1014        | Germany                                                               |
| Sample-1370        | Sweden                                                                |
| V24324             | Estonia                                                               |
| Sample-882         | Poland                                                                |
| Sample-1035        | Poland                                                                |
| V38014             | Estonia                                                               |
| Sample-624         | Sweden                                                                |
| Sample-1469        | Sweden                                                                |
| V10538             | Estonia                                                               |
| V44245             | Estonia                                                               |
| Sample-296         | Germany                                                               |
| Sample-1548        | Sweden                                                                |
| V4935              | Estonia                                                               |
| V27318             | Estonia                                                               |
| V0526              | Estonia                                                               |
| V27140             | Estonia                                                               |
| V45128             | Estonia                                                               |
| G500017208-ASM     | Estonia                                                               |
| V49498             | Estonia                                                               |
| Sample-1251        | Sweden                                                                |
| Sample-1904        | Germany                                                               |
| Sample-1094        | Sweden                                                                |
| G500016212-ASM     | Albania                                                               |
| V12718             | Estonia                                                               |
| Sample-166         | Germany                                                               |
| GRC15560154        | Estonia                                                               |
| V46101             | Estonia                                                               |
| GRC15560154        | Jewish                                                                |
| Sample-323         | Ukraine                                                               |
| Sample-1755        | Russian Federation                                                    |
| V50315             | Estonia                                                               |
| Sample-1793        | Russian Federation                                                    |
| Sample-879         | Poland                                                                |
|                    | Indian, Arab (Tatars)                                                 |
| Sample-34          | Sweden                                                                |
| G500016441-ASM     | United Kingdom                                                        |
| Sample-1025        | Germany                                                               |
| GRC15560110        | Jewish                                                                |
| V16582             | Estonia                                                               |
| N420512105-37-8601 | Italy                                                                 |
| V46510             | Estonia                                                               |
| V44939             | Estonia                                                               |
| V50787             | Estonia                                                               |
| V13304             | Estonia                                                               |
| V46369             | Estonia                                                               |
| V2828              | Estonia                                                               |
| Sample-624         | Sweden                                                                |
| Sample-1800        | Sweden                                                                |
| GRC15560124        | Druze                                                                 |
| GRC15560113        | Druze                                                                 |
| Sample-1081        | Sweden                                                                |
| Sample-1016        | Poland                                                                |
| Sample-136         | Latvia                                                                |
