# Supplementary material
Source: PubMed Central journal article supplement (PMC8484622)
Supplement: 41431_2021_897_MOESM14_ESM.pdf [file 41431_2021_897_MOESM14_ESM.pdf]

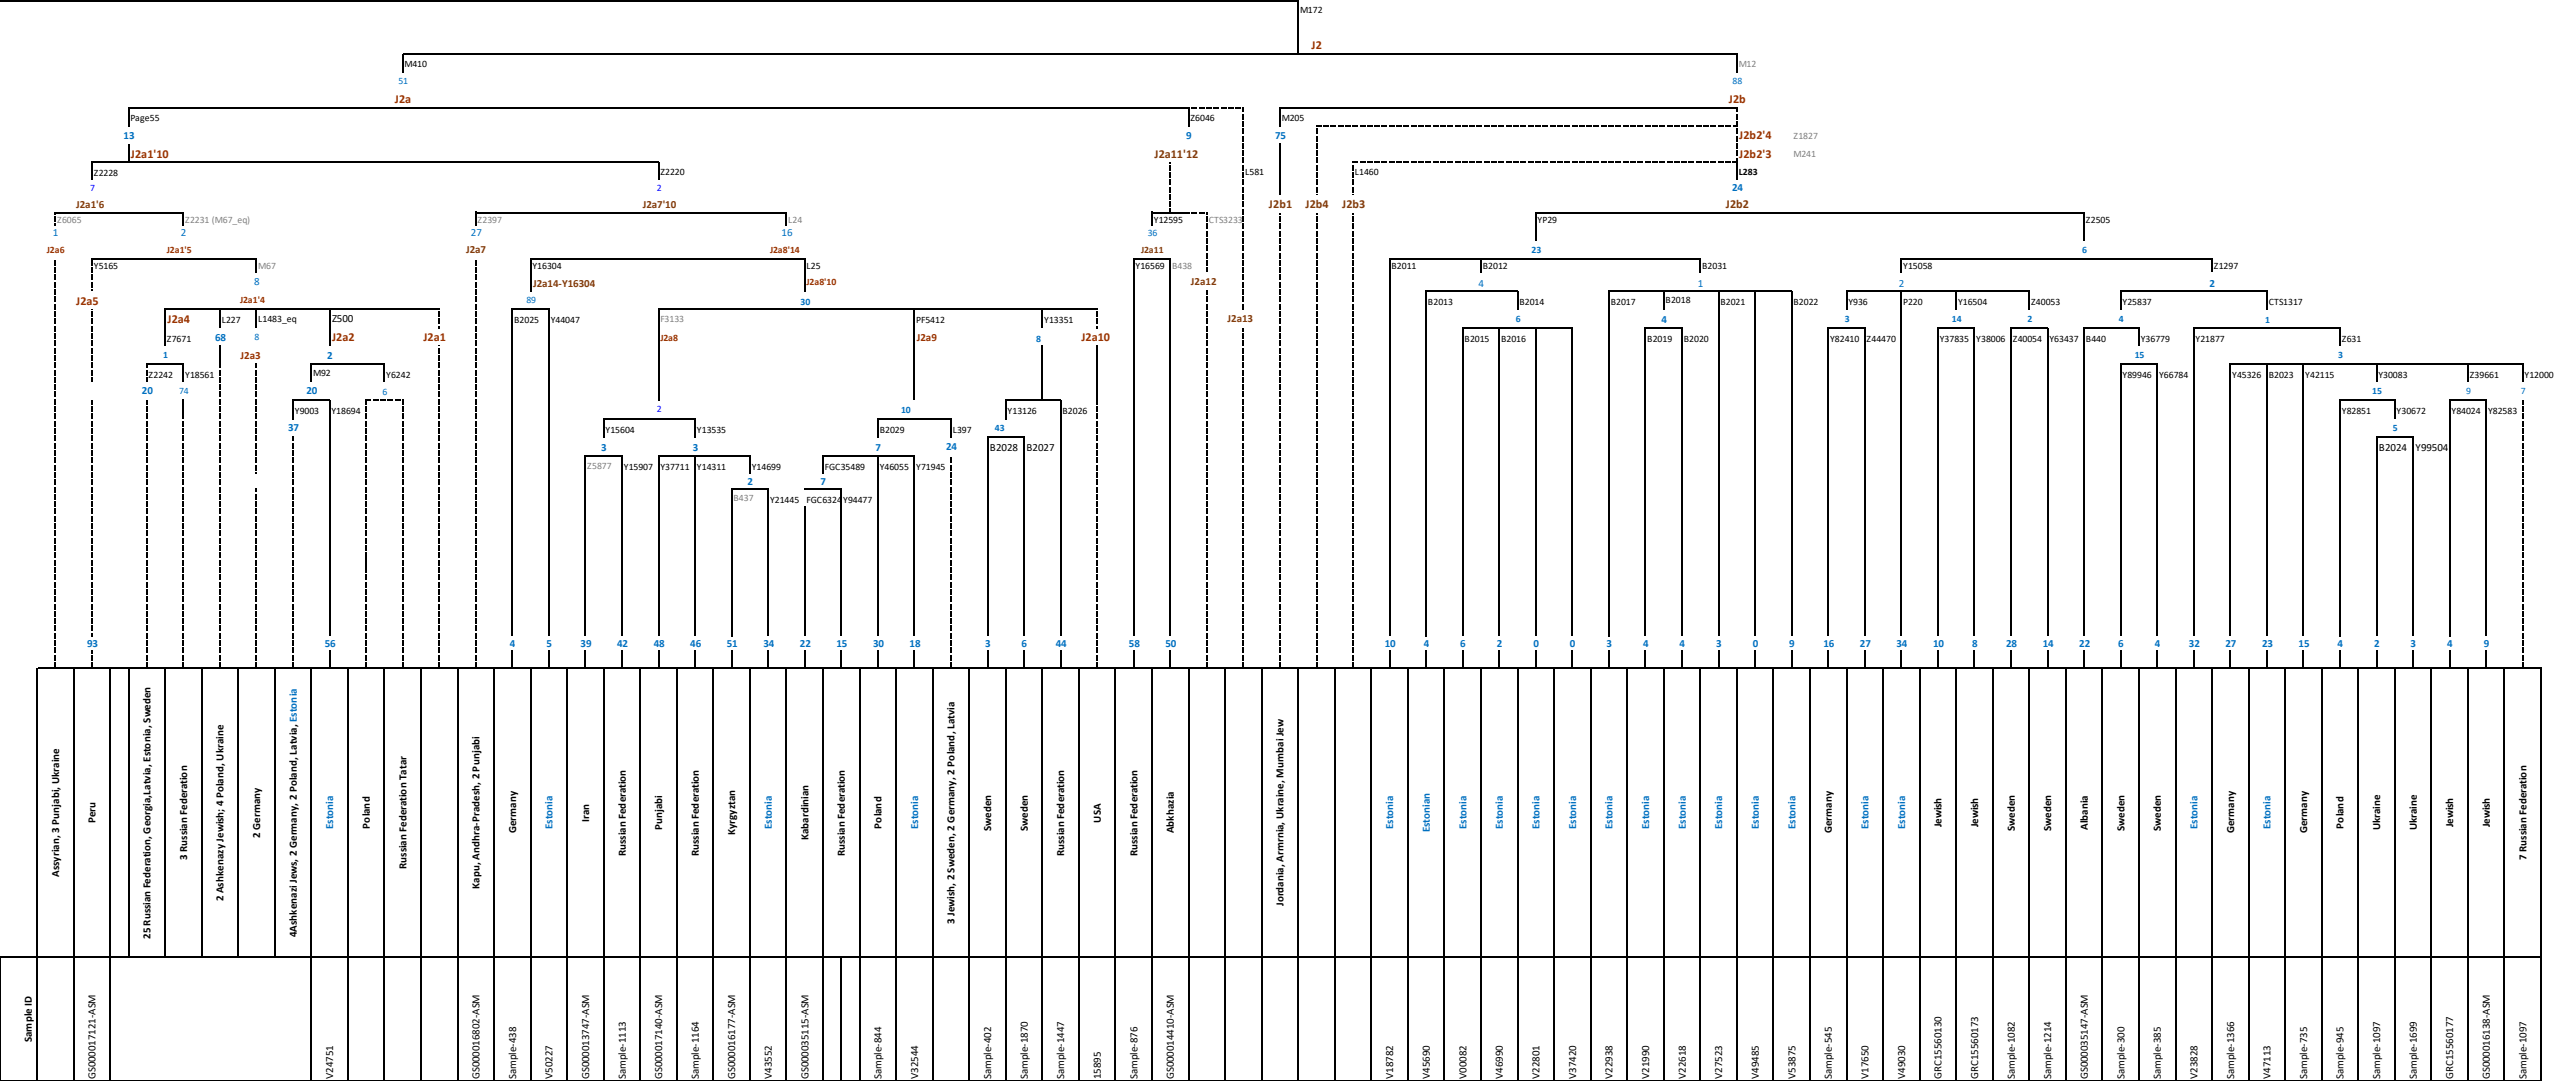

| Sample ID       | Geographical Location                                   |
|-----------------|---------------------------------------------------------|
| G5000017121-A3M | Asyrian, 3 Punjabi, Ukraine                             |
|                 | Peru                                                    |
|                 | 25 Russian Federation, Georgia, Latvia, Estonia, Sweden |
|                 | 3 Russian Federation                                    |
|                 | 2 Ashkenazy Jewish, 4 Poland, Ukraine                   |
|                 | 2 Germany                                               |
| V24751          | 4 Ashkenazy Jews, 2 Germany, 2 Poland, Latvia, Estonia  |
|                 | Estonia                                                 |
|                 | Poland                                                  |
|                 | Russian Federation Tatar                                |
| G5000016802-A3M | Kapu, Andhra Pradesh, 2 Punjabi                         |
| Sample-488      | Germany                                                 |
| V50227          | Estonia                                                 |
| G5000013747-A3M | Iran                                                    |
| Sample-113      | Russian Federation                                      |
| G5000017440-A3M | Punjab                                                  |
| Sample-1164     | Russian Federation                                      |
| G5000016177-A3M | Kyrgyzan                                                |
| V43552          | Estonia                                                 |
| G5000035115-A3M | Kabardinian                                             |
|                 | Russian Federation                                      |
| Sample-844      | Poland                                                  |
| V25244          | Estonia                                                 |
| Sample-402      | Sweden                                                  |
| Sample-1870     | Sweden                                                  |
| Sample-1447     | Russian Federation                                      |
| 15895           | USA                                                     |
| Sample-876      | Russian Federation                                      |
| G5000014410-A3M | Abkhazian                                               |
|                 | Jordan, Amrit, Ukraine, Mumbai Jew                      |
| V18782          | Estonia                                                 |
| V45690          | Estonian                                                |
| V00082          | Estonia                                                 |
| V46990          | Estonia                                                 |
| V23801          | Estonia                                                 |
| V37420          | Estonia                                                 |
| V2938           | Estonia                                                 |
| V21990          | Estonia                                                 |
| V22638          | Estonia                                                 |
| V27523          | Estonia                                                 |
| V49485          | Estonia                                                 |
| V53875          | Estonia                                                 |
| Sample-545      | Germany                                                 |
| V17650          | Estonia                                                 |
| V49030          | Estonia                                                 |
| GRC15560130     | Jewish                                                  |
| GRC15560173     | Jewish                                                  |
| Sample-1082     | Sweden                                                  |
| Sample-1214     | Sweden                                                  |
| G500003547-A3M  | Albania                                                 |
| Sample-300      | Sweden                                                  |
| Sample-385      | Sweden                                                  |
| V23828          | Estonia                                                 |
| Sample-1366     | Germany                                                 |
| V47113          | Estonia                                                 |
| Sample-735      | Germany                                                 |
| Sample-945      | Poland                                                  |
| Sample-1097     | Ukraine                                                 |
| Sample-1699     | Ukraine                                                 |
| GRC15560177     | Jewish                                                  |
| G500001638-A3M  | Jewish                                                  |
| Sample-1097     | 7 Russian Federation                                    |
