# Supplementary material
Source: PubMed Central journal article supplement (PMC8484622)
Supplement: 41431_2021_897_MOESM17_ESM.pdf [file 41431_2021_897_MOESM17_ESM.pdf]

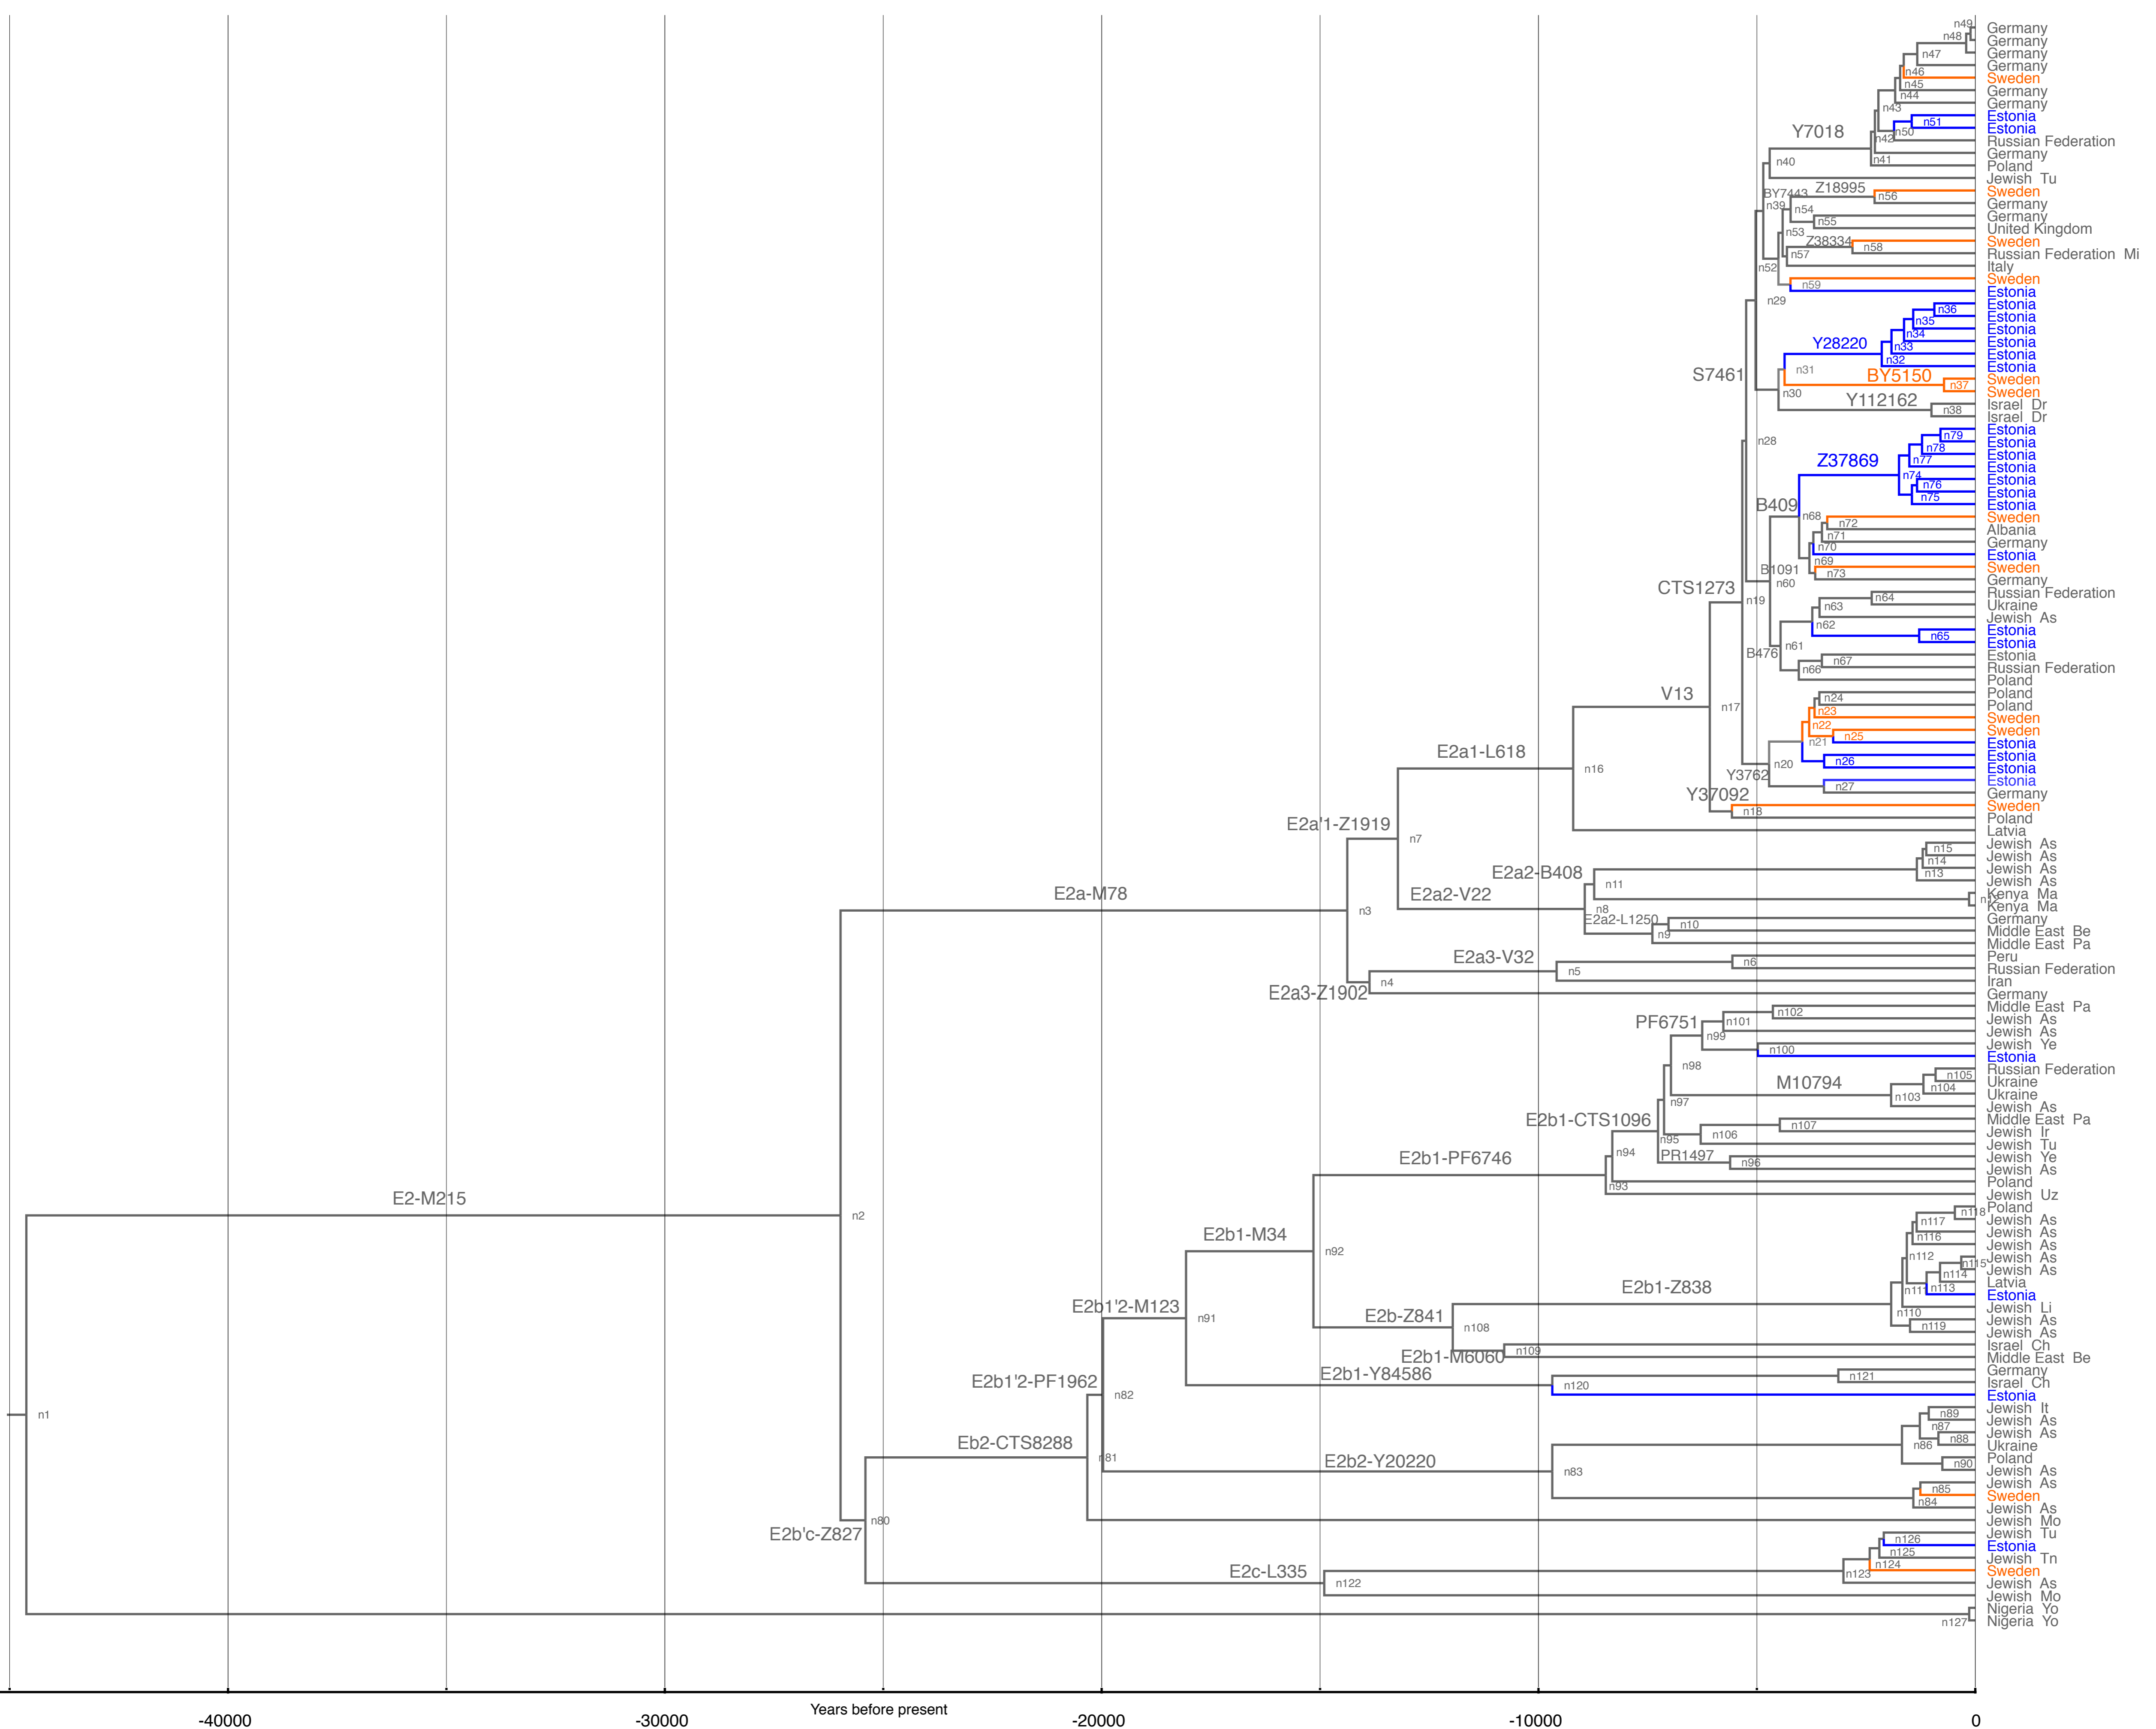

-40000

-30000

Years before present

-20000

-10000

0

- Germany n49
- Germany n48
- Germany n47
- Germany n46
- Sweden n45
- Germany n44
- Germany n43
- Estonia n51
- Russian Federation n50
- Poland n42
- Germany n41
- Poland n40
- Jewish Tu n39
- Sweden n56
- Germany n54
- United Kingdom n55
- Sweden n53
- Russian Federation Mi n57
- Sweden n58
- Sweden n52
- Sweden n59
- Estonia n29
- Estonia n36
- Estonia n35
- Estonia n34
- Estonia n33
- Estonia n32
- Sweden n31
- Sweden n37
- Israel Dr n30
- Israel Dr n38
- Estonia n28
- Estonia n79
- Estonia n78
- Estonia n77
- Estonia n74
- Estonia n76
- Estonia n75
- Sweden n68
- Albania n72
- Germany n71
- Estonia n70
- Sweden n69
- Sweden n73
- Germany n60
- Russian Federation n63
- Ukraine n64
- Jewish As n62
- Estonia n65
- Estonia n61
- Russian Federation n66
- Poland n67
- Poland n24
- Sweden n23
- Sweden n22
- Sweden n25
- Estonia n21
- Estonia n26
- Estonia n27
- Germany n18
- Poland n15
- Latvia n14
- Jewish As n13
- Jewish As n11
- Kenya Ma n8
- Kenya Ma n9
- Germany n10
- Middle East Be n9
- Middle East Pa n6
- Peru n5
- Russian Federation n4
- Iran n3
- Germany n101
- Middle East Pa n102
- Jewish As n99
- Jewish As n100
- Jewish Ye n98
- Estonia n105
- Russian Federation n104
- Ukraine n103
- Ukraine n107
- Jewish As n97
- Jewish Ir n106
- Jewish Tu n94
- Jewish Ye n96
- Jewish As n93
- Poland n117
- Poland n118
- Jewish As n116
- Jewish As n112
- Jewish As n115
- Jewish As n114
- Latvia n111
- Estonia n113
- Jewish Li n110
- Jewish As n119
- Israel Ch n108
- Middle East Be n109
- Germany n120
- Israel Ch n121
- Jewish It n89
- Jewish As n87
- Jewish As n88
- Ukraine n86
- Poland n90
- Jewish As n85
- Jewish As n84
- Jewish As n83
- Jewish As n126
- Jewish Tu n125
- Estonia n123
- Sweden n124
- Jewish As n122
- Jewish Mo n127
- Nigeria Yo n127
