# Supplementary material
Source: PubMed Central journal article supplement (PMC8484622)

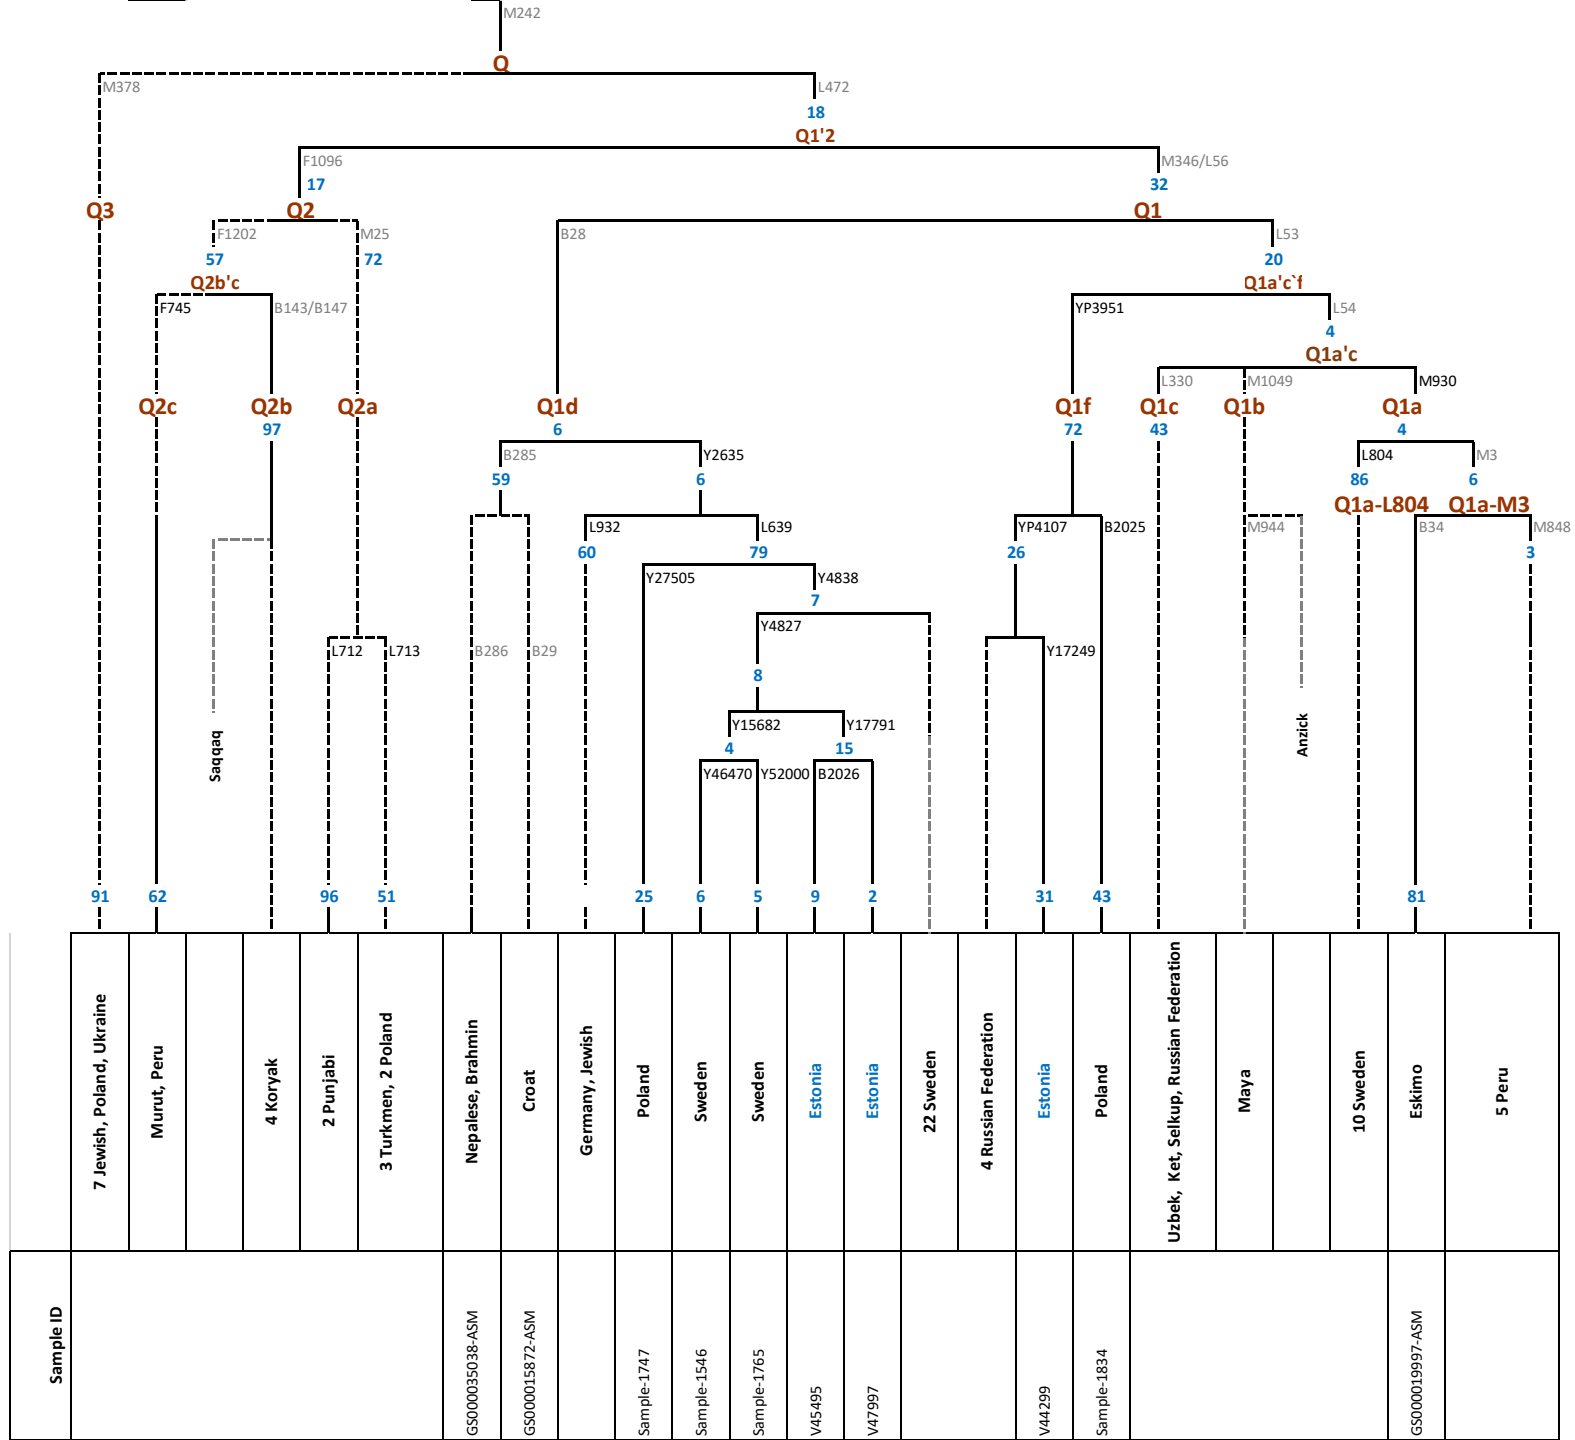

Supplement: 41431_2021_897_MOESM15_ESM.pdf [file 41431_2021_897_MOESM15_ESM.pdf]

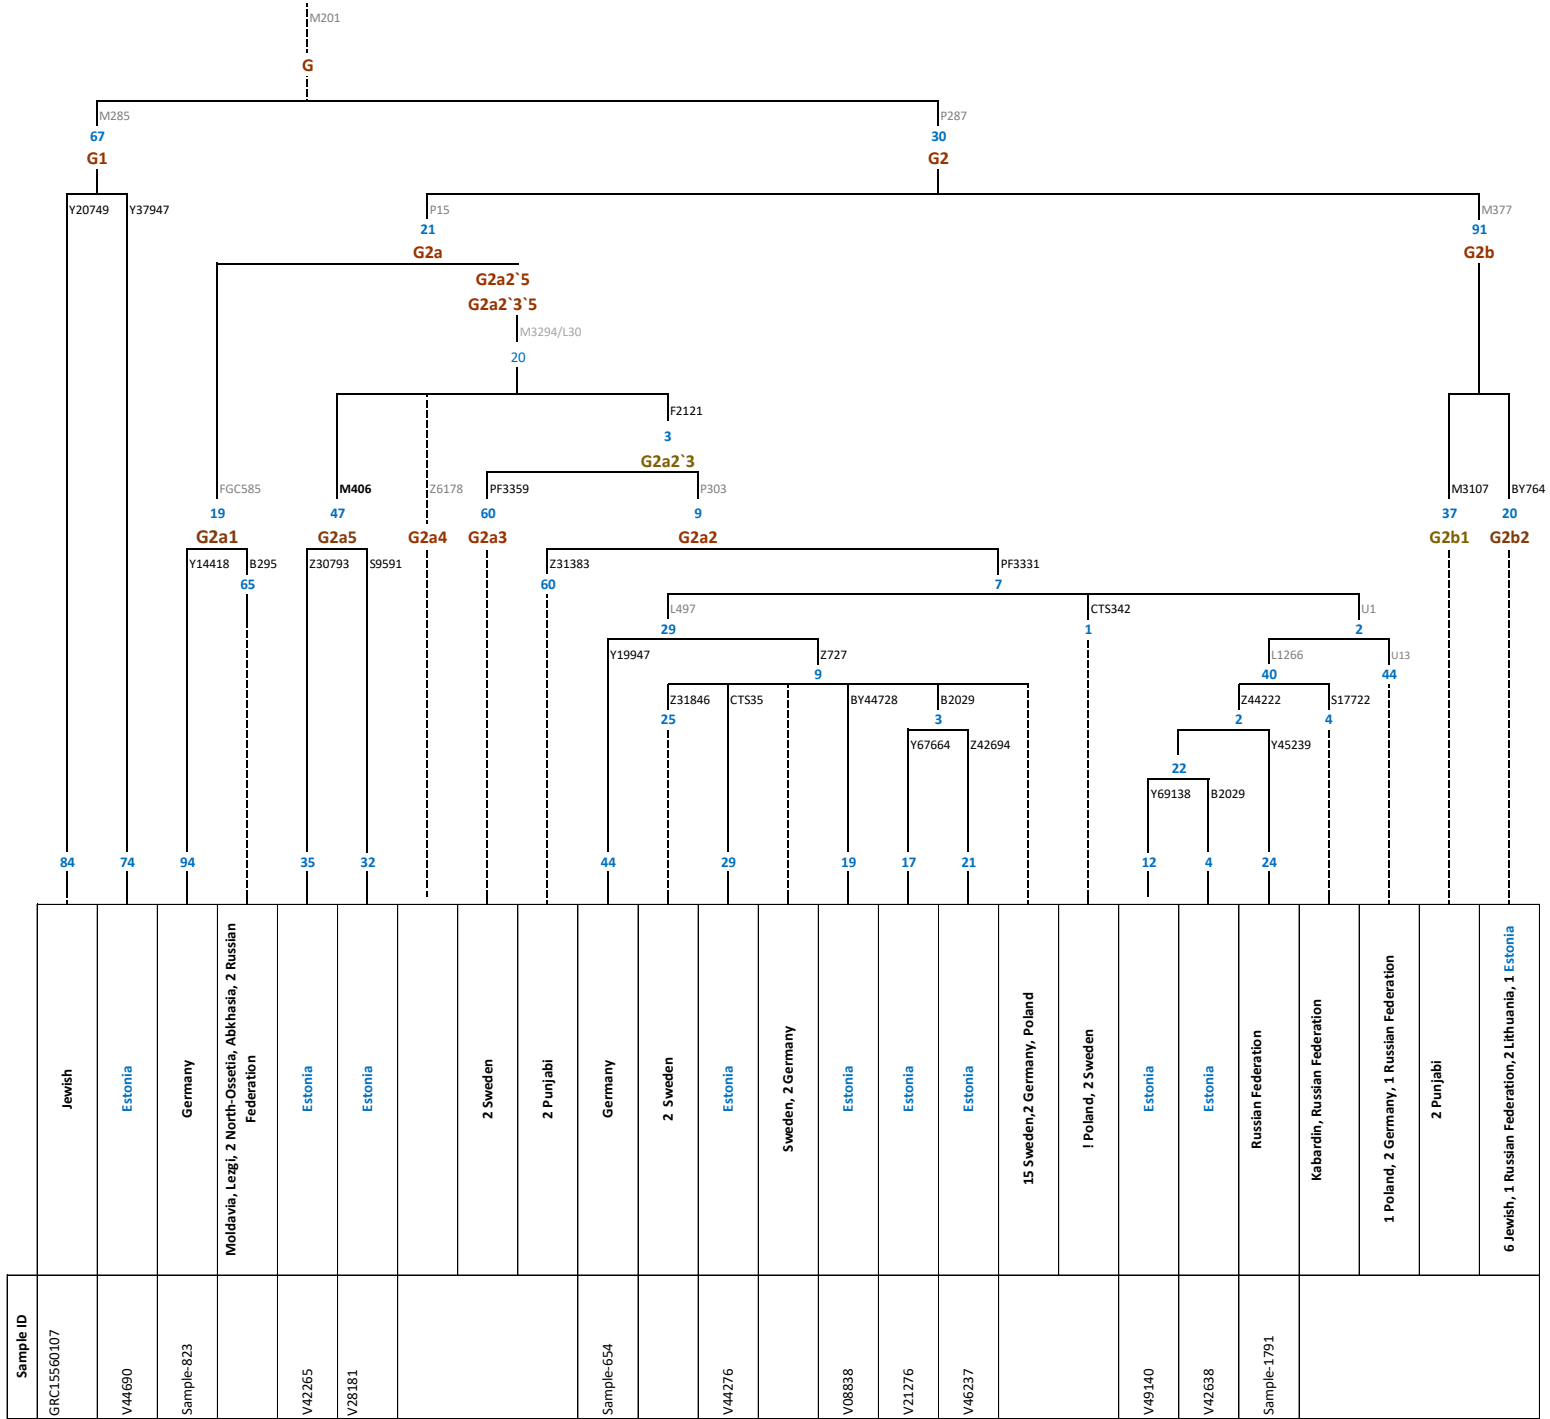

Supplement: 41431_2021_897_MOESM16_ESM.pdf [file 41431_2021_897_MOESM16_ESM.pdf]

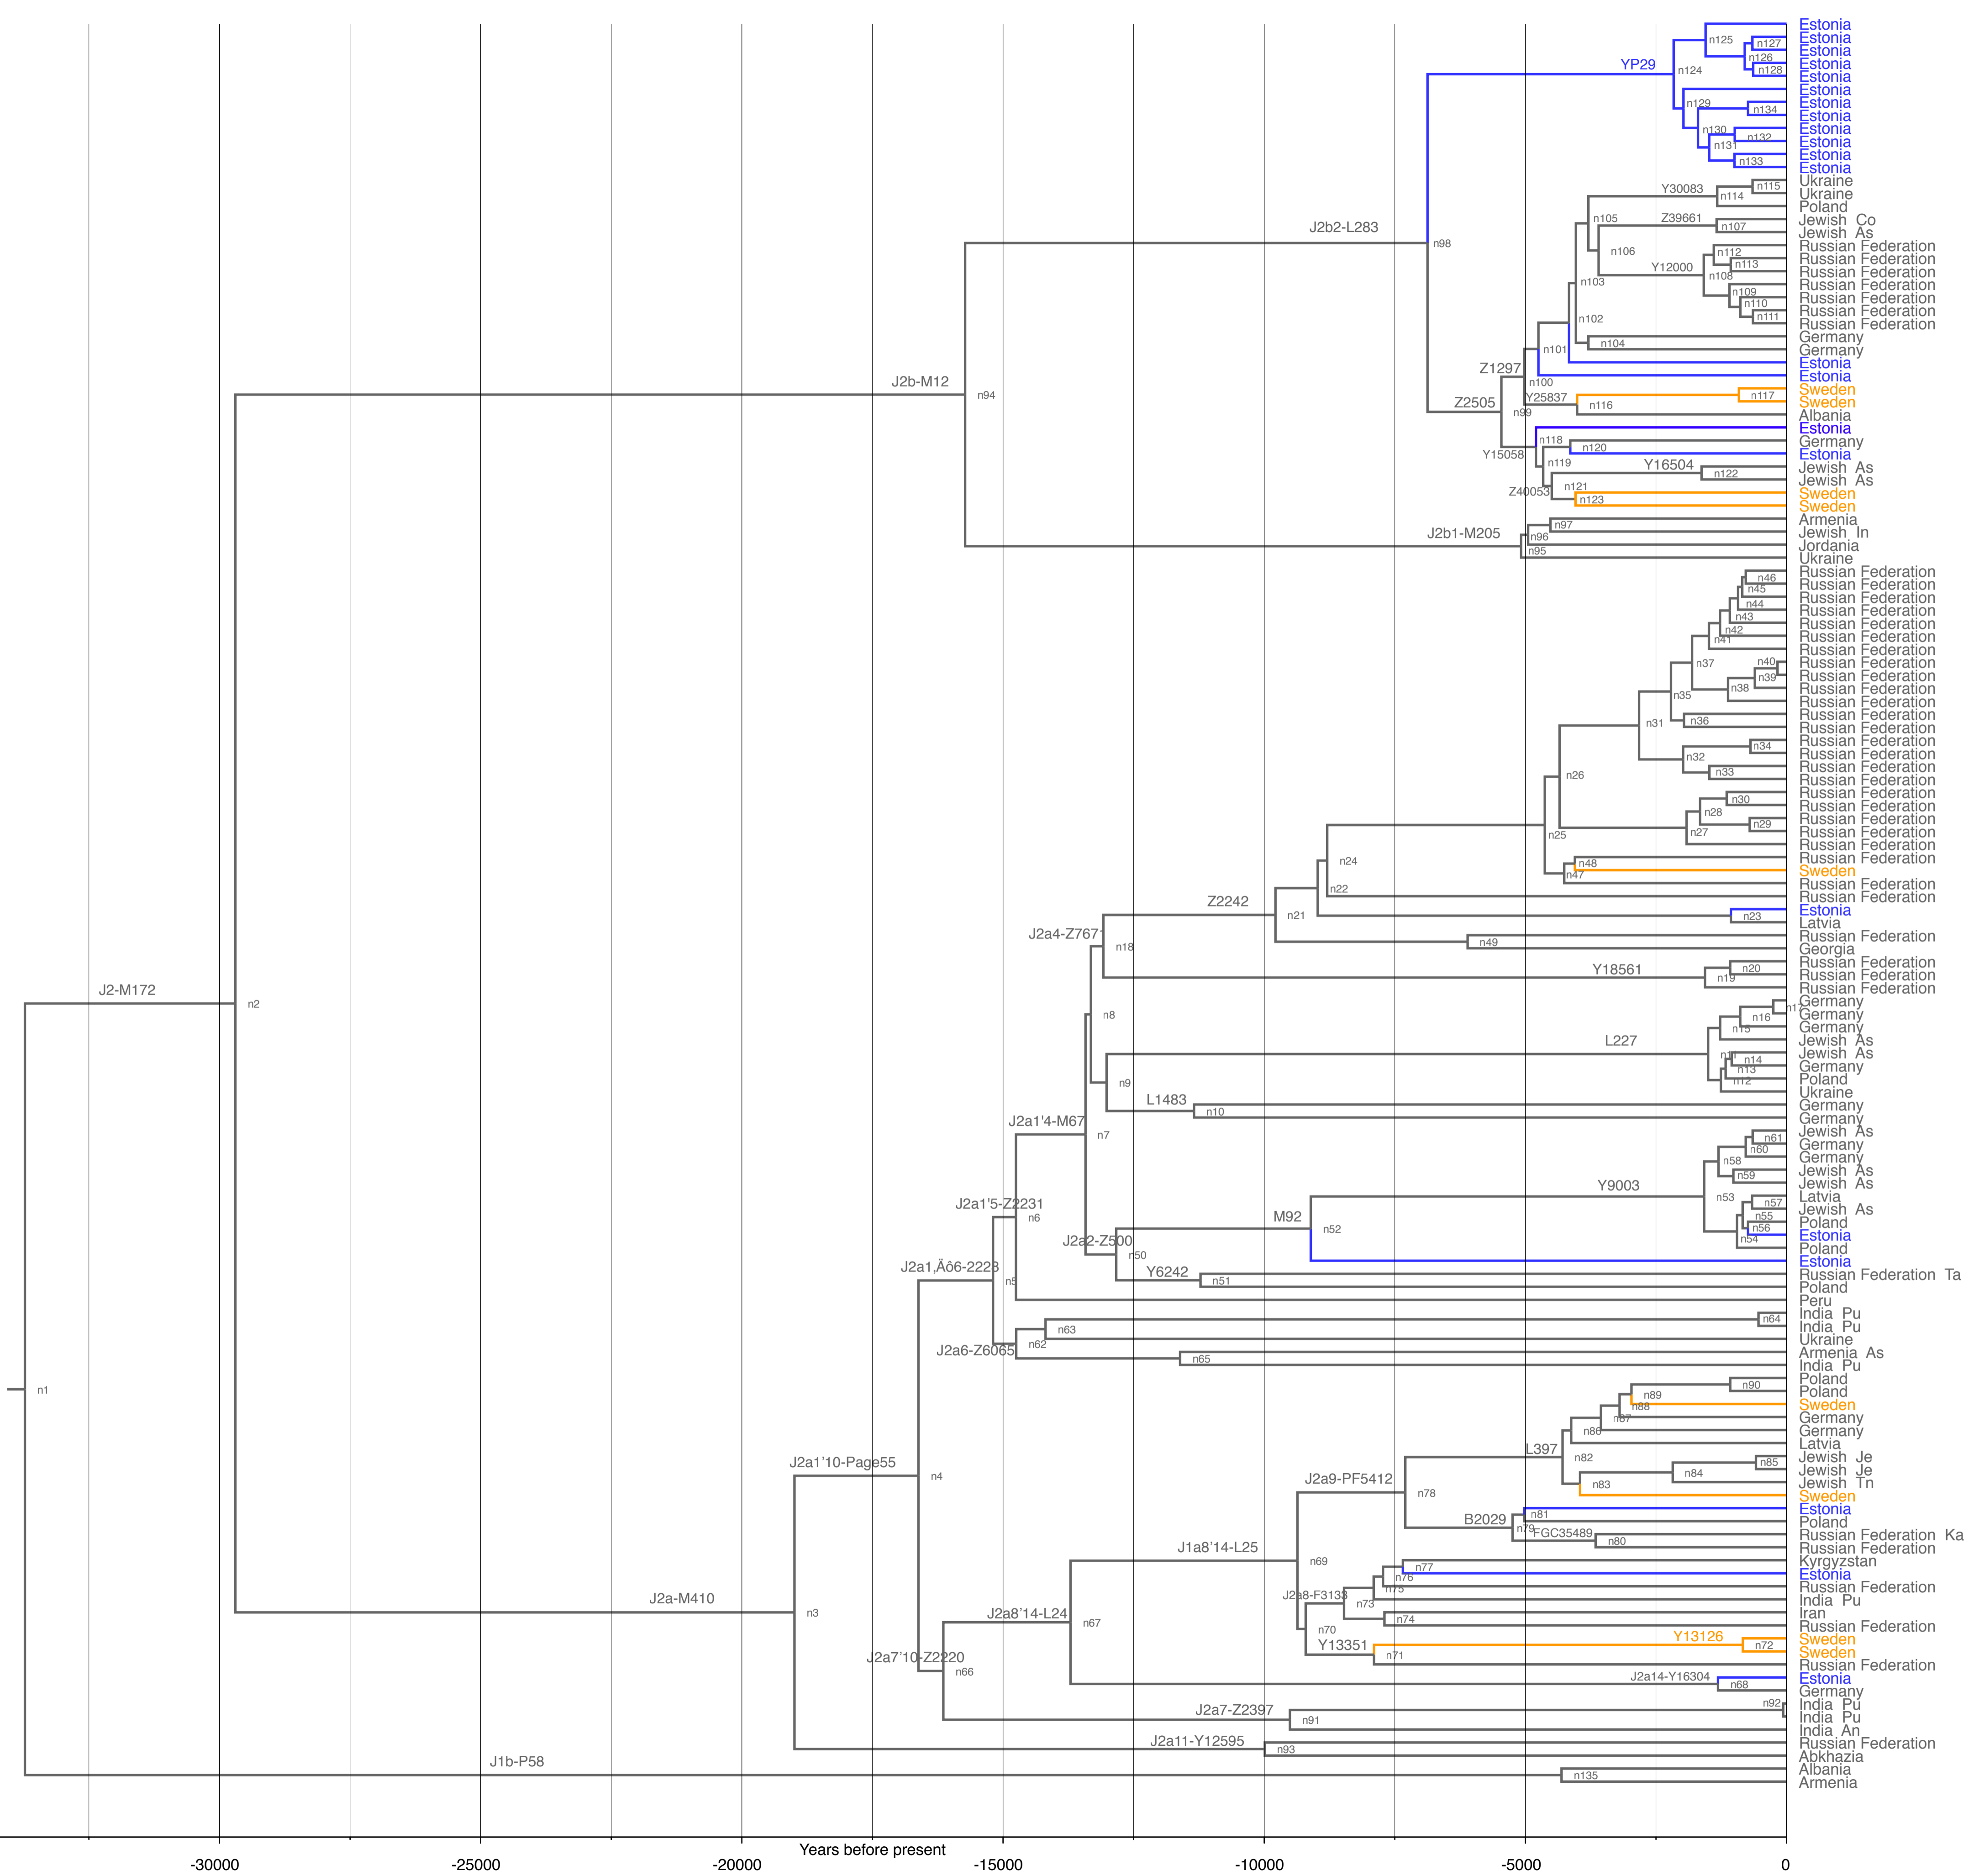

Supplement: 41431_2021_897_MOESM18_ESM.pdf [file 41431_2021_897_MOESM18_ESM.pdf]

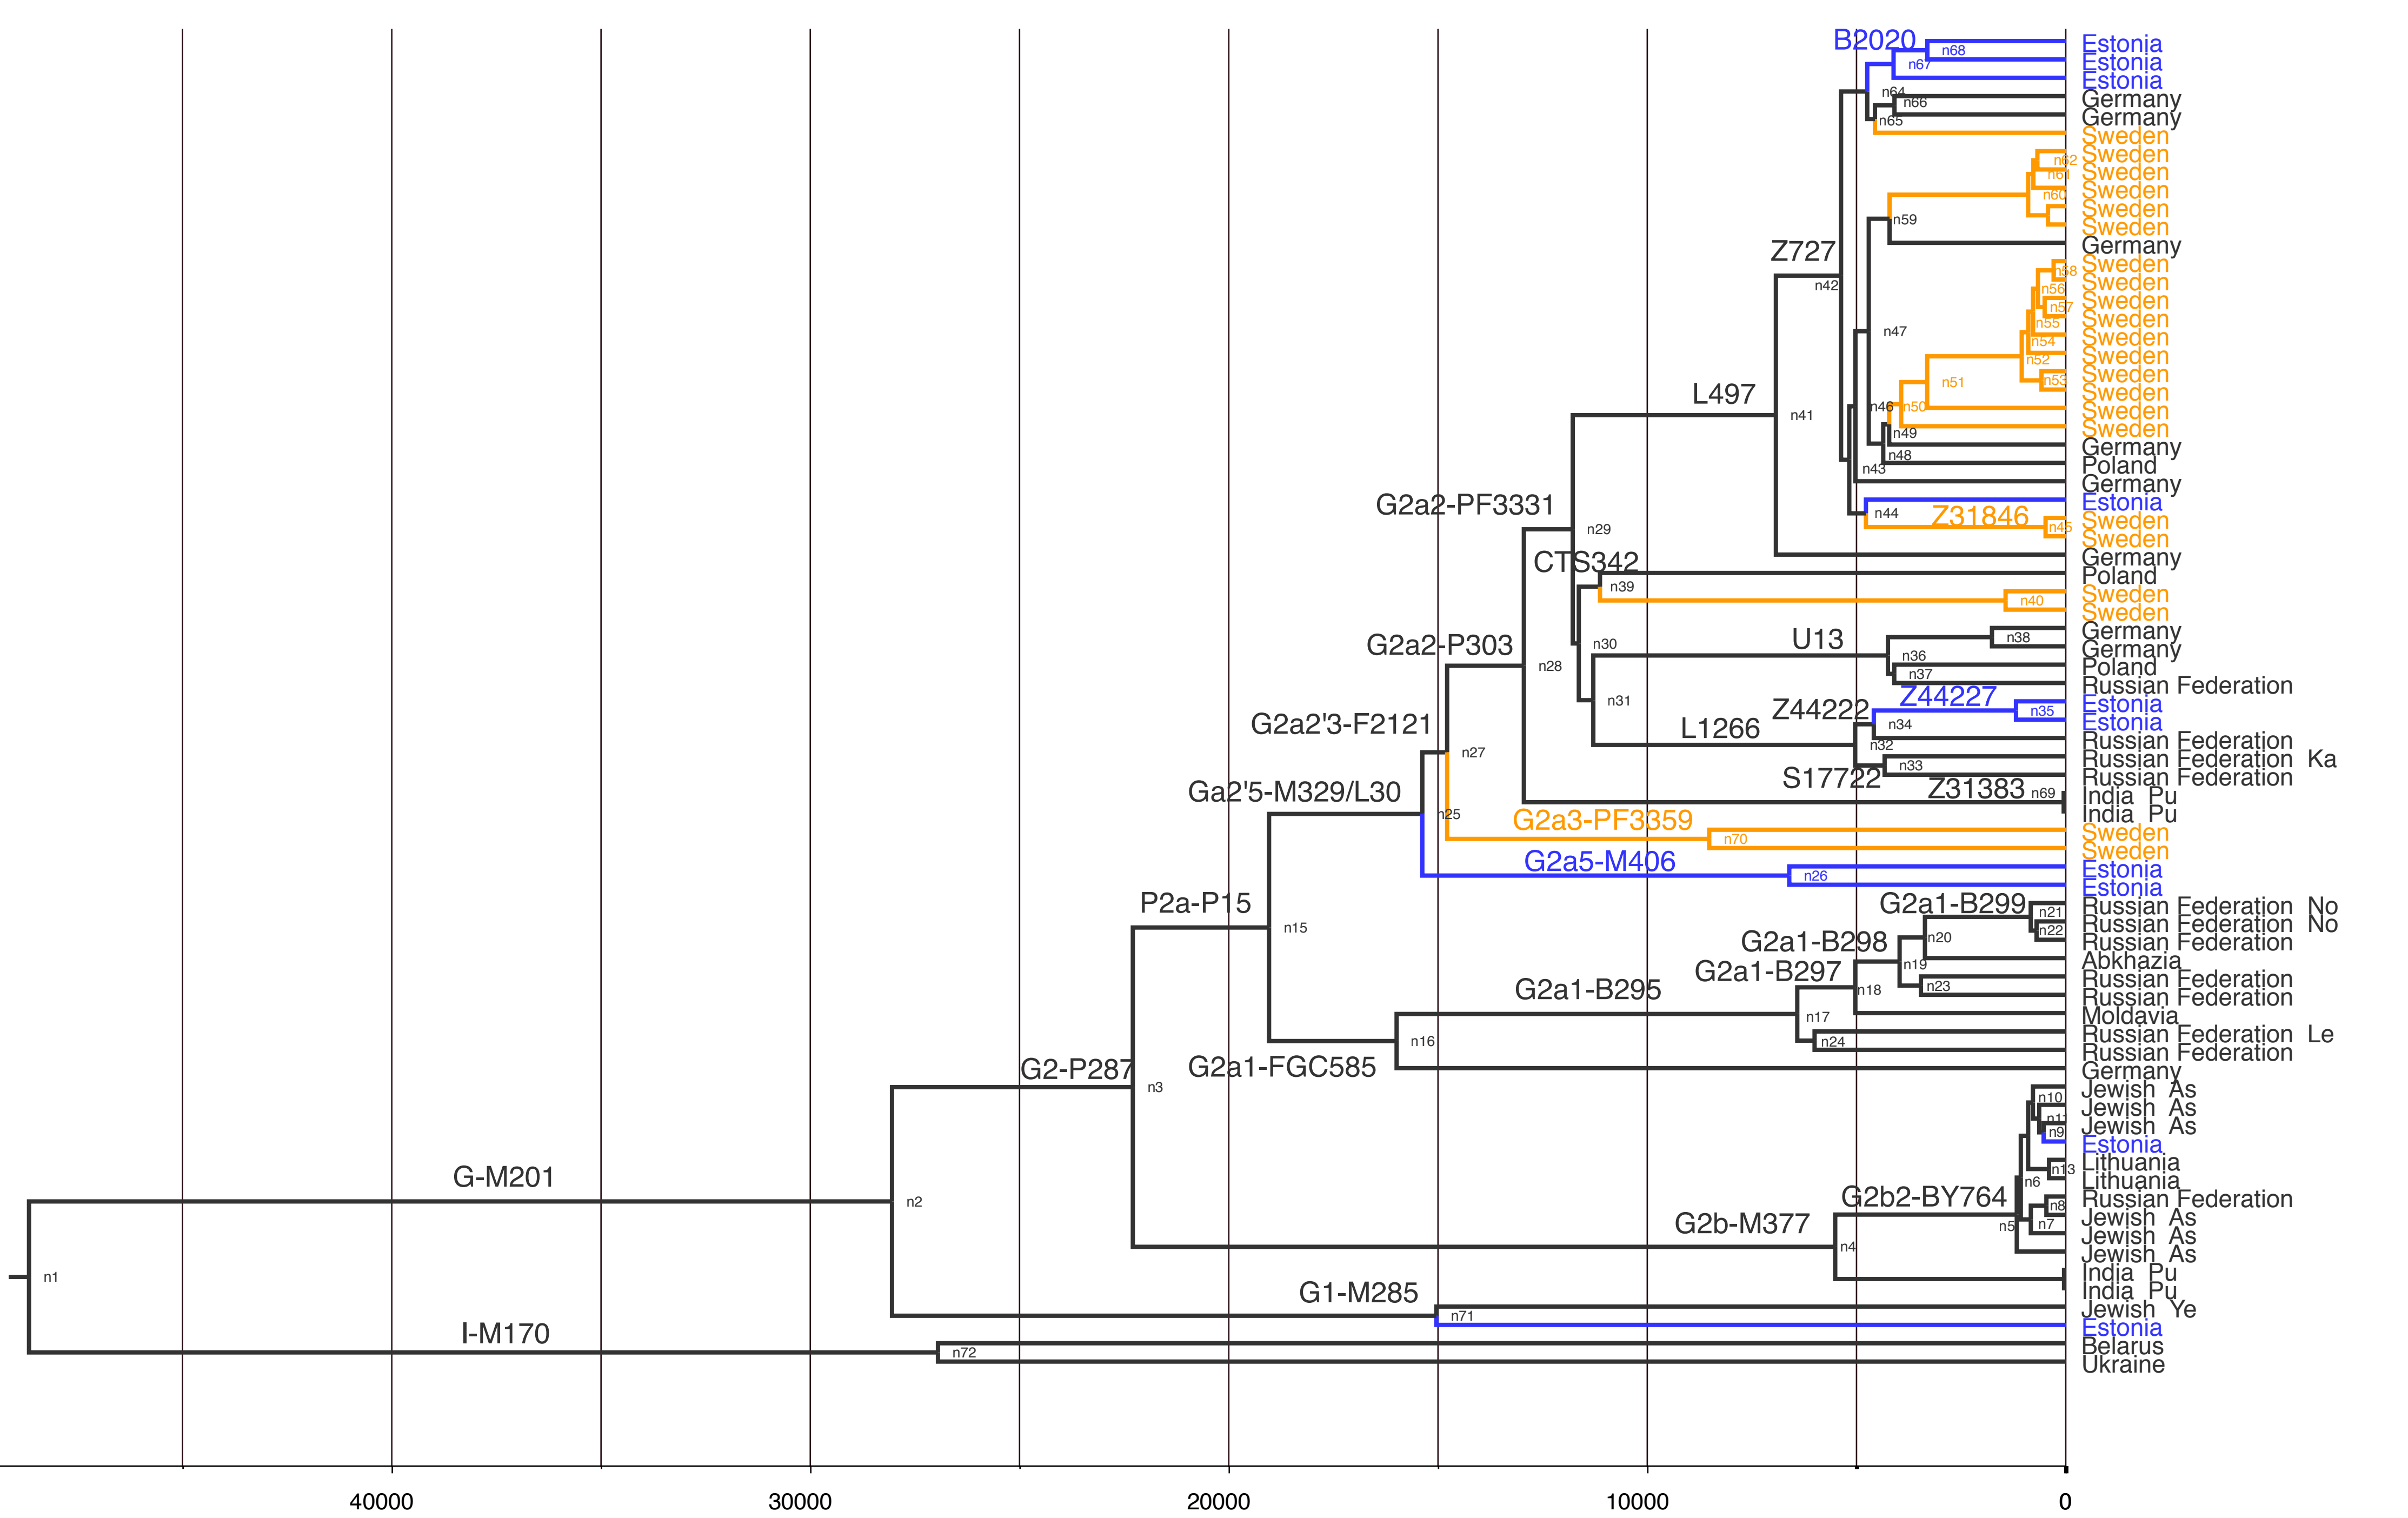

Supplement: 41431_2021_897_MOESM19_ESM.pdf [file 41431_2021_897_MOESM19_ESM.pdf]

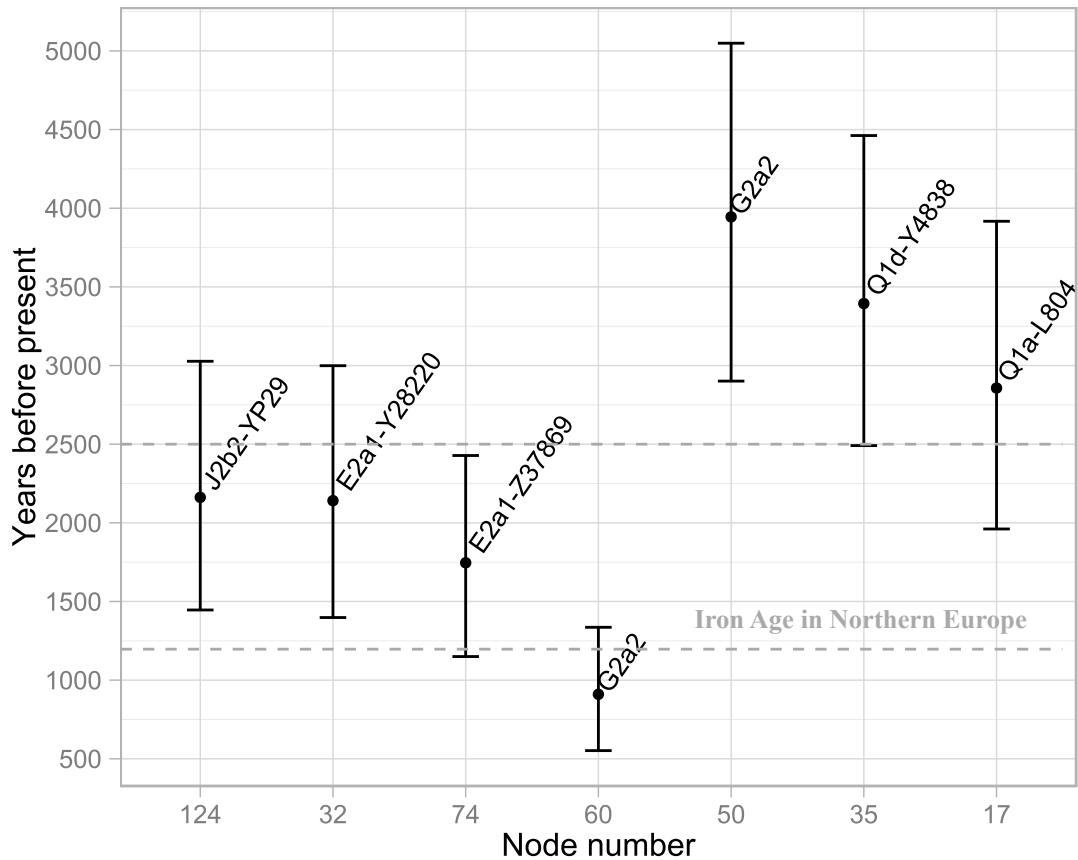

Supplement: 41431_2021_897_MOESM20_ESM.pdf [file 41431_2021_897_MOESM20_ESM.pdf]
